# Supplementary material for: In vivo reconstitution finds multivalent RNA–RNA interactions as drivers of mesh-like condensates
Source: eLife. 2021 Mar 2;10:e64252. doi: 10.7554/eLife.64252 (PMC7968931; doi:10.7554/eLife.64252)
Supplement: Figure 3—source data 1. [file elife-64252-fig3-data1.xlsx]

## Sheet: RNA
Batch	Gene name	length (nt)	Number of AUUUA	GC content	Ensemble diversity	Normalized ensemble diversity	Predicted network formation	Experimental network formation	Link of RNAfold prediction
1	CD47	4194	19	0.3541	1003.91	0.239368		YES	http://rna.tbi.univie.ac.at//cgi-bin/RNAWebSuite/RNAfold.cgi?PAGE=3&ID=36NoR6zrUA
1	HuR	4909	13	0.4388	1626.74	0.331379		YES	http://rna.tbi.univie.ac.at//cgi-bin/RNAWebSuite/RNAfold.cgi?PAGE=3&ID=AiaDSluflZ
1	PD-L1	2705	14	0.3904	717.67	0.265312		YES	http://rna.tbi.univie.ac.at//cgi-bin/RNAWebSuite/RNAfold.cgi?PAGE=3&ID=ejPJPQDXzJ
1	FUS	1814	5	0.4614	296.97	0.16371		NO	http://rna.tbi.univie.ac.at//cgi-bin/RNAWebSuite/RNAfold.cgi?PAGE=3&ID=gyYTWddyW7
2	CD44	3069	7	0.3927	632.91	0.206227		YES	http://rna.tbi.univie.ac.at//cgi-bin/RNAWebSuite/RNAfold.cgi?PAGE=3&ID=QeKLhFDMMc
2	VSIG10	3046	7	0.407	856.49	0.281185		YES	http://rna.tbi.univie.ac.at//cgi-bin/RNAWebSuite/RNAfold.cgi?PAGE=3&ID=qvYC7DmLs_
2	IL10	1034	8	0.4207	307.8	0.297679		NO	http://rna.tbi.univie.ac.at//cgi-bin/RNAWebSuite/RNAfold.cgi?PAGE=3&ID=57a4qu75IU
2	TLR8	1003	3	0.3935	235.26	0.234556		NO	http://rna.tbi.univie.ac.at//cgi-bin/RNAWebSuite/RNAfold.cgi?PAGE=3&ID=uBp2kAY_xU
2	GPR39	976	2	0.5005	268.2	0.274795		NO	http://rna.tbi.univie.ac.at//cgi-bin/RNAWebSuite/RNAfold.cgi?PAGE=3&ID=cD0D59chmO
2	HEATR5B	595	4	0.2958	205.66	0.345647		NO	http://rna.tbi.univie.ac.at//cgi-bin/RNAWebSuite/RNAfold.cgi?PAGE=3&ID=4iBNTU7Zqs
2	TNFAIP6	515	4	0.2491	110.43	0.214427		NO	http://rna.tbi.univie.ac.at//cgi-bin/RNAWebSuite/RNAfold.cgi?PAGE=3&ID=0AOnrcjfqn
2	GPR34	496	4	0.256	116.5	0.234879		NO	http://rna.tbi.univie.ac.at//cgi-bin/RNAWebSuite/RNAfold.cgi?PAGE=3&ID=PEXsoi9wQB
2	MYC	476	4	0.2697	103.38	0.217185		NO	http://rna.tbi.univie.ac.at//cgi-bin/RNAWebSuite/RNAfold.cgi?PAGE=3&ID=q3HZyCnOZa
2	PLA2G4A	473	4	0.2672	109.73	0.231987		NO	http://rna.tbi.univie.ac.at//cgi-bin/RNAWebSuite/RNAfold.cgi?PAGE=3&ID=7zUiQmX0JZ
2	PPP1R3F	1000	5	0.481	375.85	0.37585		YES	http://rna.tbi.univie.ac.at//cgi-bin/RNAWebSuite/RNAfold.cgi?PAGE=3&ID=OwyeIKRNV7
2	DRD1	1723	6	0.3558	608.66	0.353256		YES	http://rna.tbi.univie.ac.at//cgi-bin/RNAWebSuite/RNAfold.cgi?PAGE=3&ID=lxc3MNCivl
2	MCOLN2	1102	4	0.4147	394.98	0.358421		YES	http://rna.tbi.univie.ac.at//cgi-bin/RNAWebSuite/RNAfold.cgi?PAGE=3&ID=Lyq0KNlxYQ
2	TNFSF11	1095	7	0.3397	409.26	0.373753		YES	http://rna.tbi.univie.ac.at//cgi-bin/RNAWebSuite/RNAfold.cgi?PAGE=3&ID=MF14WTEhCZ
2	FAM72B	1095	6	0.3178	420.66	0.384164		YES	http://rna.tbi.univie.ac.at//cgi-bin/RNAWebSuite/RNAfold.cgi?PAGE=3&ID=H1l9IUWiyY
2	TSPAN13	1045	4	0.315789	327.6	0.313493		YES	http://rna.tbi.univie.ac.at//cgi-bin/RNAWebSuite/RNAfold.cgi?PAGE=3&ID=j7ZAAHAuje
2	LHFPL6	1044	4	0.369732	370.04	0.354444		YES	http://rna.tbi.univie.ac.at//cgi-bin/RNAWebSuite/RNAfold.cgi?PAGE=3&ID=98A2FMHFbP
2	FAM174A	557	4	0.2753	189.24	0.339749		YES	http://rna.tbi.univie.ac.at//cgi-bin/RNAWebSuite/RNAfold.cgi?PAGE=3&ID=TK3pgFOgK4
2	VPS29	482	4	0.2937	157.27	0.326286		YES	http://rna.tbi.univie.ac.at//cgi-bin/RNAWebSuite/RNAfold.cgi?PAGE=3&ID=KCwBjrSRMM
3	ADPGK	1047	5	0.4117	332.95	0.318004	YES	YES	http://rna.tbi.univie.ac.at//cgi-bin/RNAWebSuite/RNAfold.cgi?PAGE=3&ID=JXs8k8RWhC
3	ASPN	1083	3	0.2955	322.14	0.297452	YES	YES	http://rna.tbi.univie.ac.at//cgi-bin/RNAWebSuite/RNAfold.cgi?PAGE=3&ID=G1brxKy2o3
3	CASP8	1117	3	0.3778	197.71	0.177001	NO	YES	http://rna.tbi.univie.ac.at//cgi-bin/RNAWebSuite/RNAfold.cgi?PAGE=3&ID=zMP8AV0Mfx
3	CLCA2	1026	2	0.3236	228.3	0.222515	NO	NO	http://rna.tbi.univie.ac.at//cgi-bin/RNAWebSuite/RNAfold.cgi?PAGE=3&ID=a3v1Uy0Mrd
3	EOMES	1117	3	0.3876	357.07	0.319669	YES	YES	http://rna.tbi.univie.ac.at//cgi-bin/RNAWebSuite/RNAfold.cgi?PAGE=3&ID=v2x1ReVltl
3	ESCO1	1059	2	0.3277	212.89	0.201029	NO	YES	http://rna.tbi.univie.ac.at//cgi-bin/RNAWebSuite/RNAfold.cgi?PAGE=3&ID=MMNOomMacW
3	GLYATL3	1164	3	0.3789	340.9	0.292869	YES	NO	http://rna.tbi.univie.ac.at//cgi-bin/RNAWebSuite/RNAfold.cgi?PAGE=3&ID=j_HrflY_vp
3	HNRNPH3	1142	3	0.317	275.6	0.241331	NO	NO	http://rna.tbi.univie.ac.at//cgi-bin/RNAWebSuite/RNAfold.cgi?PAGE=3&ID=iyDKGgIKQV
3	HOGA1	1143	3	0.5013	380.86	0.333211	YES	YES	http://rna.tbi.univie.ac.at//cgi-bin/RNAWebSuite/RNAfold.cgi?PAGE=3&ID=agSruaMy0J
3	LPAR4	1130	3	0.3124	317.35	0.280841	YES	YES	http://rna.tbi.univie.ac.at//cgi-bin/RNAWebSuite/RNAfold.cgi?PAGE=3&ID=CY3PnV9d0K
3	LRBA	1063	3	0.3547	195.31	0.183735	NO	YES	http://rna.tbi.univie.ac.at//cgi-bin/RNAWebSuite/RNAfold.cgi?PAGE=3&ID=k6Al9u5Stp
3	LYPLAL1	1130	3	0.2805	414.75	0.367035	YES	YES	http://rna.tbi.univie.ac.at//cgi-bin/RNAWebSuite/RNAfold.cgi?PAGE=3&ID=LXTfIdgKQv
3	ODF2	1037	3	0.4147	197.61	0.190559	NO	YES	http://rna.tbi.univie.ac.at//cgi-bin/RNAWebSuite/RNAfold.cgi?PAGE=3&ID=f6bdWiWGpb
3	PRKDC	1062	3	0.354	193.44	0.182147	NO	NO	http://rna.tbi.univie.ac.at//cgi-bin/RNAWebSuite/RNAfold.cgi?PAGE=3&ID=Y5G7uQ8Nu1
3	RHOA	1064	3	0.3976	184.93	0.173806	NO	NO	http://rna.tbi.univie.ac.at//cgi-bin/RNAWebSuite/RNAfold.cgi?PAGE=3&ID=HOuRBErP87
3	SHQ1	1007	2	0.3614	345.94	0.343535	YES	YES	http://rna.tbi.univie.ac.at//cgi-bin/RNAWebSuite/RNAfold.cgi?PAGE=3&ID=Gx1zpKF6vM
3	SLC39A6	1062	6	0.3173	256.05	0.241102	NO	NO	http://rna.tbi.univie.ac.at//cgi-bin/RNAWebSuite/RNAfold.cgi?PAGE=3&ID=WR4IwNIzyI
3	SLC5A9	1095	3	0.474	136.75	0.124886	NO	NO	http://rna.tbi.univie.ac.at//cgi-bin/RNAWebSuite/RNAfold.cgi?PAGE=3&ID=uWOCvDoDJN
3	SMIM3	1113	3	0.478	201.81	0.181321	NO	NO	http://rna.tbi.univie.ac.at//cgi-bin/RNAWebSuite/RNAfold.cgi?PAGE=3&ID=_PzNAOGsxl
3	SNTN	1117	2	0.3912	345.79	0.30957	YES	YES	http://rna.tbi.univie.ac.at//cgi-bin/RNAWebSuite/RNAfold.cgi?PAGE=3&ID=sicZRhO5h7
3	SOSTDC1	1067	3	0.3299	205.26	0.192371	NO	NO	http://rna.tbi.univie.ac.at//cgi-bin/RNAWebSuite/RNAfold.cgi?PAGE=3&ID=ksFg5yq9Xa
3	STBD1	1130	2	0.4106	173.1	0.153186	NO	NO	http://rna.tbi.univie.ac.at//cgi-bin/RNAWebSuite/RNAfold.cgi?PAGE=3&ID=brCIHrUbJD
3	TP53TG3	1024	3	0.3555	303.96	0.296836	YES	YES	http://rna.tbi.univie.ac.at//cgi-bin/RNAWebSuite/RNAfold.cgi?PAGE=3&ID=s_SqRZTLqa
3	TTC17	1027	2	0.3992	358.41	0.348987	YES	YES	http://rna.tbi.univie.ac.at//cgi-bin/RNAWebSuite/RNAfold.cgi?PAGE=3&ID=ihW52kV9fp
