# Supplementary material for: In vivo reconstitution finds multivalent RNA–RNA interactions as drivers of mesh-like condensates
Source: eLife. 2021 Mar 2;10:e64252. doi: 10.7554/eLife.64252 (PMC7968931; doi:10.7554/eLife.64252)
Supplement: Figure 6—source data 1. [file elife-64252-fig6-data1.xlsx]

## Sheet: Sheet1
Gene	Refseq_ID	3'UTR_length (nt)	Number of AU-rich elements (3'UTRs)	Ensemble diversity (3'UTR)	NED	NED category [2:high, 1: low]	Conservation_score (3'UTR)
ACADM	16	916	6	254.54	0.2779	.	0.07751
ACADS	17	560	0	154.31	0.2756	.	0.024
ACADVL	18	170	0	25	0.1471	1	.
ACAT1	19	778	4	237.06	0.3047	2	0.08978
PSEN1	21	4402	8	1216.62	0.2764	.	0.07262
ADA	22	315	1	45.09	0.1431	1	.
ADSL	26	226	0	60.43	0.2674	.	0.04683
AGA	27	934	6	306.41	0.3281	2	0.05758
AGL	28	2372	11	630.62	0.2659	.	0.11287
ALAD	31	1988	0	510.09	0.2566	1	0.15411
APC	38	2113	7	631.95	0.2991	2	0.3012
APOE	41	145	0	28.94	0.1996	1	0.0561
FAS	43	2611	10	646.87	0.2477	1	0.07934
ARSB	46	3188	4	786.6	0.2467	1	0.05002
ASL	48	431	0	59.45	0.1379	1	.
ASS1	50	253	0	65.29	0.2581	1	0.08892
ATM	51	3591	8	718.48	0.2001	1	0.045
ATP7A	52	3825	15	976.82	0.2554	1	0.16558
ATP7B	53	2087	1	447.44	0.2144	1	0.0397
BCHE	55	479	2	137.72	0.2875	2	0.20092
BCKDHB	56	304	0	66.95	0.2202	1	0.0749
BLM	57	183	1	56.93	0.3111	2	0.16374
BRCA2	59	902	3	204.3	0.2265	1	0.04362
BTD	60	2150	5	410.35	0.1909	1	0.04971
CA2	67	703	2	184.28	0.2621	1	0.38119
CBS	71	689	0	115.82	0.1681	1	.
CDK4	75	798	0	202.74	0.2541	1	0.22787
CDKN2A	77	477	1	95.58	0.2004	1	0.00934
LYST	81	1909	6	403.63	0.2114	1	0.26686
ERCC8	82	783	2	184.81	0.236	1	0.0638
CLCN5	84	7016	12	1757.12	0.2504	1	.
CLN3	86	237	0	72.91	0.3076	2	0.08382
CPOX	97	1237	3	302.89	0.2449	1	0.07468
CPT2	98	602	3	139.2	0.2312	1	0.11631
CST3	99	259	0	76.26	0.2944	2	0.02633
CSTB	100	537	0	147.19	0.2741	.	0.00032
CYBA	101	64	0	2.66	0.0416	1	0.01124
DDB2	107	369	0	97.94	0.2654	.	0.06891
DLD	108	1939	10	609.19	0.3142	2	0.13297
SLC26A2	112	5587	19	1334.29	0.2388	1	0.07165
TOR1A	113	1030	2	293.04	0.2845	2	0.11903
TAZ	116	722	0	214.66	0.2973	2	0.02976
EMD	117	326	0	79.1	0.2426	1	0.17756
EPHX1	120	216	0	50.59	0.2342	1	0.03169
EPOR	121	779	0	197.27	0.2532	1	0.01537
ERCC3	122	306	2	105.76	0.3456	2	0.05027
ERCC5	123	98	0	14.65	0.1495	1	0.0991
ERCC6	124	4335	11	1061.44	0.2449	1	.
ETFA	126	272	0	37.88	0.1393	1	.
EXT1	127	349	0	85.58	0.2452	1	0.25323
FANCA	135	1050	2	275.15	0.262	1	0.36416
FANCC	136	2653	3	603.94	0.2276	1	0.02121
FAH	137	373	0	83.3	0.2233	1	0.08208
FECH	140	5871	10	1477.72	0.2517	1	0.0822
FGFR2	141	1527	8	459.99	0.3012	2	0.55043
FGFR3	142	1610	4	322.29	0.2002	1	0.29822
FH	143	271	0	73.74	0.2721	.	0.12646
FXN	144	6315	14	1305.68	0.2068	1	.
FTL	146	144	0	29.77	0.2067	1	0.2822
FUCA1	147	638	1	128.42	0.2013	1	0.06159
GAA	152	551	0	164.75	0.299	2	0.01937
GALK1	154	119	0	32.25	0.271	.	.
GALT	155	149	0	22.98	0.1542	1	0.60402
GAMT	156	333	0	49.79	0.1495	1	0.08569
GBA	157	547	0	105.79	0.1934	1	0.35912
GBE1	158	708	2	169.37	0.2392	1	0.0878
GCDH	159	458	1	59.5	0.1299	1	0.03699
GCH1	161	2012	10	560.44	0.2785	.	0.15779
GJA1	165	1748	5	.	.	.	0.61334
GK	167	2720	16	595.79	0.219	1	0.19627
GLI3	168	3381	7	1008.76	0.2984	2	0.19321
GLA	169	18	0	0.66	0.0367	1	.
GLDC	170	553	1	153.59	0.2777	.	0.37918
GP1BA	173	467	1	.	.	.	.
GPI	175	2377	2	569.08	0.2394	1	0.09832
NR3C1	176	3958	14	1200.81	0.3034	2	0.57022
GSN	177	239	0	73.42	0.3072	2	0.38312
GSS	178	395	0	69.71	0.1765	1	.
GUSB	181	213	0	23.13	0.1086	1	0.0804
HADHA	182	615	1	168.36	0.2738	.	0.11091
HADHB	183	512	0	76.47	0.1494	1	0.33326
HK1	188	747	1	209.73	0.2808	2	0.42921
HK2	189	2413	5	540.26	0.2239	1	0.17229
HMBS	190	266	0	40	0.1504	1	.
HMGCL	191	586	0	107.15	0.1828	1	0.03776
HPRT1	194	591	1	124.18	0.2101	1	0.42014
HPS1	195	1366	0	281.06	0.2058	1	0.01659
SGSH	199	1172	0	264.18	0.2254	1	0.00886
IDS	202	5756	12	1310.78	0.2277	1	0.05869
INSR	208	4801	9	1271.28	0.2648	1	0.16531
ITGA6	210	2387	8	611.55	0.2562	1	0.29055
KHK	221	1001	1	282.51	0.2822	2	0.06336
KIT	222	2158	3	764.85	0.3544	2	0.22845
KRT18	224	59	0	13.01	0.2205	1	0.13368
LAMA3	227	418	1	107.87	0.2581	1	.
SGCB	232	3262	14	857.2	0.2628	1	0.09054
LIG1	234	204	0	55.59	0.2725	.	0.06505
LIPA	235	1259	0	354.66	0.2817	2	0.03578
MEN1	244	820	1	197.67	0.2411	1	0.13606
NAGA	262	1945	3	574.66	0.2955	2	0.06002
NAGLU	263	211	0	27.94	0.1324	1	0.59247
PTCH1	264	3411	9	804.81	0.2359	1	0.38294
NF1	267	3522	14	1046.75	0.2972	2	0.18821
NF2	268	3798	0	1136.94	0.2994	2	0.13493
NME1	269	244	1	74.66	0.306	2	0.29065
PNP	270	1405	1	424.89	0.3024	2	0.03231
NPC1	271	703	1	257.48	0.3663	2	0.41459
NPHP1	272	455	4	99.11	0.2178	1	0.06074
OAT	274	639	1	178.69	0.2796	.	0.06929
OCRL	276	2286	5	379.84	0.1662	1	0.14822
PAX6	280	5142	15	1325.28	0.2577	1	0.92656
PCBD1	281	442	1	72.46	0.1639	1	0.03628
PCCA	282	271	3	47.36	0.1748	1	0.66984
PDHA1	284	2054	4	420.62	0.2048	1	0.07754
PEPD	285	395	1	85.3	0.2159	1	0.11402
PEX12	286	987	2	237.97	0.2411	1	0.13477
PEX6	287	462	0	87.66	0.1897	1	.
PEX7	288	408	3	114.43	0.2805	2	0.19937
PFKM	289	696	2	171.6	0.2466	1	0.49822
PGK1	291	997	3	294.47	0.2954	2	0.24604
PHKA2	292	1187	1	329.98	0.278	.	0.06055
PHKB	293	2157	8	567.57	0.2631	1	0.10127
PHKG2	294	4079	5	936.66	0.2296	1	0.11784
PKD2	297	2085	7	679.36	0.3258	2	0.15531
PLOD1	302	734	1	213.76	0.2912	2	0.06456
PMM2	303	1512	0	232.75	0.1539	1	0.01649
PMP22	304	1140	3	288.08	0.2527	1	0.56284
PON2	305	468	1	98.63	0.2107	1	0.15996
CTSA	308	370	0	142.22	0.3844	2	0.16867
PPOX	309	44	0	5.14	0.1168	1	0.19508
PPT1	310	1351	2	340.74	0.2522	1	0.12417
PRNP	311	1606	2	.	.	.	0.30434
PROS1	313	1208	3	381.14	0.3155	2	0.05452
PTEN	314	6458	24	1818.2	0.2815	2	0.58993
PTS	317	418	5	139.33	0.3333	2	0.04897
PEX2	318	3003	8	.	.	.	0.05315
PEX5	319	1260	3	259.39	0.2059	1	0.141
QDPR	320	738	2	194.59	0.2637	1	0.0475
RB1	321	1819	12	454	0.2496	1	0.44619
PITX2	325	702	1	137.24	0.1955	1	0.86185
RPGR	328	456	4	103.63	0.2273	1	0.30904
ATXN1	332	7217	13	1711.69	0.2372	1	0.55843
ATXN7	333	3995	14	1094.51	0.274	.	0.33102
SMN1	344	577	2	137.39	0.2381	1	.
SNCA	345	2529	5	721.6	0.2853	2	0.21789
SOX9	346	2033	8	651.64	0.3205	2	0.58583
TCOF1	356	521	0	89.87	0.1725	1	0.05172
TIMP3	362	3664	7	930.84	0.2541	1	0.35663
TNNI3	363	67	0	16.71	0.2494	1	0.17337
TPI1	365	563	0	75.8	0.1346	1	.
TPM1	366	242	0	38.89	0.1607	1	0.49947
TPMT	367	2357	4	495.81	0.2104	1	0.02289
TSC1	368	4887	5	1117.65	0.2287	1	0.18112
UMPS	373	5189	5	1380.36	0.266	.	0.05864
UROD	374	171	0	45.13	0.2639	1	0.3942
UROS	375	290	0	82.7	0.2852	2	0.0238
VDR	376	3209	2	881.86	0.2748	.	0.05466
WT1	378	1283	4	360.54	0.281	2	0.47058
XPA	380	530	2	137.29	0.259	1	0.04329
MID1	381	4058	14	965.89	0.238	1	0.20699
ALDH3A2	382	2023	2	457.47	0.2261	1	0.02548
BLMH	386	822	0	244.33	0.2972	2	0.53127
SLC25A20	387	787	1	219.74	0.2792	.	0.16389
CDKN1A	389	1539	3	356.7	0.2318	1	0.18219
CHM	390	3450	10	790.21	0.229	1	0.06419
TPP1	391	1780	2	386.26	0.217	1	0.13149
CYB5R3	398	1933	3	432.82	0.2239	1	.
ERCC2	400	238	0	85.08	0.3575	2	0.00471
EXT2	401	1143	5	185.9	0.1626	1	0.1731
G6PD	402	610	0	120.7	0.1979	1	0.03056
GALE	403	350	2	102.02	0.2915	2	0.14195
GLB1	404	437	1	81.87	0.1873	1	.
GM2A	405	2943	1	601.08	0.2042	1	0.08487
GPD2	408	3485	12	1071.77	0.3075	2	0.39733
HLCS	411	3358	10	990.63	0.295	2	0.12021
HSD17B4	414	341	0	59.85	0.1755	1	0.16766
IFNGR1	416	547	0	120.41	0.2201	1	0.0201
IL4R	418	948	1	291.37	0.3074	2	0.01642
KRT10	421	359	2	61.32	0.1708	1	0.58935
PAFAH1B1	430	3813	11	1138.68	0.2986	2	0.80199
NEU1	434	667	0	210.1	0.315	2	0.11912
NOTCH3	435	1029	1	261.92	0.2545	1	0.40047
OXCT1	436	1664	5	431.44	0.2593	1	0.06183
PAFAH2	437	2222	2	497.74	0.224	1	0.09561
PAX3	438	475	0	102.63	0.2161	1	0.63448
PLEC	445	1030	0	240.67	0.2337	1	0.298
PSEN2	447	524	0	152.56	0.2911	2	0.19498
RFX5	449	1546	3	390.99	0.2529	1	0.21723
SOD1	454	353	1	109.94	0.3114	2	0.26135
STK11	455	859	1	284.6	0.3313	2	0.11268
SUOX	456	498	0	132.39	0.2658	.	0.06259
UBE3A	462	1888	4	502.37	0.2661	.	0.32097
BARD1	465	3030	10	760.8	0.2511	1	0.0543
PEX1	466	434	4	103.62	0.2388	1	0.23693
TWIST1	474	706	2	228.71	0.324	2	0.34078
AK1	476	1528	0	414.42	0.2712	.	0.10321
AMH	479	116	1	34.12	0.2941	2	0.12519
APP	484	1120	5	304.47	0.2718	.	0.5325
APRT	485	229	0	28.59	0.1248	1	.
ARSA	487	2391	0	367.59	0.1537	1	0.04974
ATRX	489	3473	19	853.95	0.2459	1	0.50222
COL4A5	495	1167	4	354.04	0.3034	2	0.3408
EYA1	503	1907	3	457.75	0.24	1	0.58077
GALNS	512	705	0	251.6	0.3569	2	0.03818
GNAS	516	367	2	53.02	0.1445	1	0.21321
HEXA	520	642	1	216.18	0.3367	2	0.05101
HEXB	521	113	0	22.03	0.195	1	0.27849
HOXA13	522	1318	4	298.59	0.2265	1	0.44652
HOXD13	523	1208	5	329.28	0.2726	.	0.40169
KCNJ11	525	1671	0	.	.	.	0.06813
LDLR	527	2514	3	595.43	0.2368	1	0.10969
PCCB	532	145	0	28.81	0.1987	1	0.09351
PMS1	534	193	0	51.06	0.2646	1	0.18694
PMS2	535	2474	2	594.87	0.2404	1	.
RFXAP	538	1850	4	554.92	0.3	2	0.13817
SMPD1	543	391	0	93.35	0.2387	1	.
TAP2	544	3445	0	1058.08	0.3071	2	0.07185
TP53	546	1207	0	187.72	0.1555	1	0.1309
TSC2	548	110	0	16.72	0.152	1	.
VHL	551	3705	3	793.3	0.2141	1	.
WRN	553	659	0	201.83	0.3063	2	0.08181
CD55	574	1356	9	278.23	0.2052	1	0.05674
GPX1	581	217	0	35.06	0.1616	1	0.42348
TAP1	593	370	1	109.4	0.2957	2	0.06337
IGFBP2	597	332	1	65.55	0.1974	1	0.42128
CD59	611	7116	10	1834.36	0.2578	1	0.03437
SLC11A2	617	2333	9	571.33	0.2449	1	0.11532
LTBP1	627	964	2	278.95	0.2894	2	0.62489
IL10RB	628	877	1	169.33	0.1931	1	0.01511
IFNAR1	629	4274	7	910.78	0.2131	1	0.02349
SOD2	636	3429	7	669.96	0.1954	1	0.10595
GSR	637	1459	1	233.86	0.1603	1	0.091
TGFB1	660	729	1	119.51	0.1639	1	0.23486
RPL9	661	112	1	21.71	0.1938	1	0.14357
ACY1	666	127	0	26.6	0.2094	1	0.0485
ADH5	671	1439	1	309.69	0.2152	1	.
ADORA2B	676	554	1	159.24	0.2874	2	0.1136
ADRA2C	683	531	1	.	.	.	0.22793
AHCY	687	769	0	205.73	0.2675	.	0.2662
ALAS1	688	147	0	25.64	0.1744	1	0.38562
ALDH2	690	410	0	117.48	0.2865	2	0.04768
ALDH1B1	692	1363	2	.	.	.	0.02054
ALDH9A1	696	838	0	152.6	0.1821	1	0.0253
ANXA1	700	286	0	92.52	0.3235	2	0.09703
ATP1A1	701	330	0	111.14	0.3368	2	0.75275
BCKDHA	709	397	0	75.59	0.1904	1	.
BLVRA	712	107	0	30.72	0.2871	2	0.08543
BLVRB	713	105	0	34.64	0.3299	2	0.19952
TSPO	714	251	0	54.76	0.2182	1	0.07004
CACNA2D1	722	3948	14	972.41	0.2463	1	0.56379
CACNB3	725	1044	0	204.29	0.1957	1	.
CACNB4	726	6348	29	1706.3	0.2688	.	0.54942
CALCB	728	574	1	108.25	0.1886	1	0.34621
CHRNA3	743	1299	3	371.48	0.286	2	.
CHRNA5	745	2016	14	506.22	0.2511	1	0.0811
CHRNB1	747	890	1	259.42	0.2915	2	0.09986
COMT	754	1239	2	221.72	0.179	1	0.03914
CRAT	755	603	0	174.82	0.2899	2	0.04199
CYP26A1	783	580	4	130.01	0.2242	1	0.2029
CYP27B1	785	808	0	272.12	0.3368	2	0.06096
CYP51A1	786	1516	5	316.44	0.2087	1	0.04824
DCK	788	1536	5	462.97	0.3014	2	0.06052
DHFR	791	2861	1	602.18	0.2105	1	0.05354
FKBP1A	801	1132	1	262.11	0.2315	1	0.28472
GABRB3	814	4247	9	1202.03	0.283	2	0.49176
GAD1	817	1269	4	316.98	0.2498	1	0.68724
GART	819	193	0	19.99	0.1036	1	0.03636
GGCX	821	5214	10	1001.09	0.192	1	.
GLRB	824	1362	8	300.09	0.2203	1	0.42481
GRINA	837	574	0	80.34	0.14	1	0.35594
GSTM2	848	450	0	78.24	0.1739	1	.
GSTM3	849	3139	1	995.8	0.3172	2	0.09126
GSTP1	852	76	0	24.51	0.3225	2	0.15988
GUCY1B1	857	1233	4	287.08	0.2328	1	.
GUK1	858	258	0	43.55	0.1688	1	0.02146
HMGCR	859	1759	4	452.55	0.2573	1	0.38158
IFNAR2	874	41	0	6.78	0.1654	1	0.04138
IGF1R	875	7088	12	1826.7	0.2577	1	0.41807
IGF2R	876	6420	4	1654.49	0.2577	1	.
IMPDH1	883	730	0	157.66	0.216	1	0.58378
IMPDH2	884	58	0	10.1	0.1741	1	.
LTA4H	895	236	1	74.92	0.3175	2	0.11632
KITLG	899	4426	20	1261.12	0.2849	2	0.16812
NR3C2	901	2580	8	690.94	0.2678	.	0.66846
NQO1	903	1575	1	362.38	0.2301	1	0.07955
NQO2	904	221	0	49.6	0.2244	1	0.00048
P4HA1	917	1005	2	301.73	0.3002	2	0.39285
P4HB	918	854	0	219.14	0.2566	1	0.14436
PAM	919	2040	10	546.69	0.268	.	0.32692
PC	920	373	0	156.96	0.4208	2	0.19231
PDE3B	922	2399	10	642.7	0.2679	.	0.16678
PDHB	925	404	2	110.82	0.2743	.	0.24552
ABCB1	927	380	1	99.75	0.2625	1	0.05469
PLAT	930	1275	4	390.27	0.3061	2	0.05776
PLCB3	932	1896	0	514.74	0.2715	.	0.38323
PLCB4	933	1807	7	350.6	0.194	1	0.60996
PLOD2	935	1277	10	459.46	0.3598	2	0.28464
POLR2A	937	439	0	126.44	0.288	2	0.26097
POLR2B	938	174	0	46.45	0.267	.	0.40631
POR	941	374	0	84.69	0.2264	1	.
PPIB	942	208	0	50.72	0.2438	1	.
PPIC	943	492	1	132.26	0.2688	.	0.11642
PPP3CA	944	2435	6	630.05	0.2587	1	0.80058
PPP3R1	945	2106	9	442.29	0.21	1	0.80132
PRIM1	946	135	1	25.51	0.189	1	0.09867
PRIM2	947	674	0	206.18	0.3059	2	0.07132
PRRG1	950	3674	4	1273.31	0.3466	2	0.15425
RARA	964	1417	2	331.13	0.2337	1	0.50396
RARB	965	1316	4	390.94	0.2971	2	0.83528
RARG	966	1110	3	245.09	0.2208	1	0.77454
RPL3	967	58	0	8.49	0.1464	1	.
RPL4	968	92	0	24.27	0.2638	1	0.02839
RPL5	969	59	0	6.81	0.1154	1	0.65554
RPL6	970	43	0	8.87	0.2063	1	0.27334
RPL7	971	68	0	11.56	0.17	1	0.06215
RPL7A	972	59	0	7.72	0.1308	1	0.332
RPL8	973	39	0	9.42	0.2415	1	0.36803
RPL11	975	52	0	4.96	0.0954	1	0.38191
RPL12	976	47	0	12.05	0.2564	1	0.17086
RPL13	977	3787	0	871.94	0.2302	1	0.04067
RPL23	978	64	0	13.38	0.2091	1	0.26549
RPL18	979	45	0	7.65	0.17	1	0.35495
RPL18A	980	61	0	15.76	0.2584	1	0.14921
RPL19	981	79	0	5.01	0.0634	1	0.2432
RPL21	982	43	0	3.84	0.0893	1	0.02703
RPL22	983	1652	4	339	0.2052	1	0.16924
RPL23A	984	475	0	102.45	0.2157	1	0.29118
RPL17	985	38	0	0.96	0.0253	1	0.33997
RPL24	986	45	0	9.79	0.2176	1	.
RPL26	987	48	0	11.72	0.2442	1	0.32653
RPL27	988	39	0	6.82	0.1749	1	0.28842
RPL30	989	91	0	12.86	0.1413	1	0.64296
RPL27A	990	4066	2	1076.36	0.2647	1	0.36539
RPL28	991	3753	0	1115.75	0.2973	2	.
RPL29	992	121	0	35.12	0.2902	2	0.43776
RPL31	993	42	0	2.92	0.0695	1	0.00355
RPL32	994	1149	2	336.55	0.2929	2	.
RPL34	995	505	1	123.26	0.2441	1	0.45528
RPL35A	996	78	0	21.62	0.2772	.	0.46983
RPL37	997	1176	3	256.59	0.2182	1	0.41454
RPL37A	998	63	1	5.02	0.0797	1	0.48619
RPL38	999	51	0	7.12	0.1396	1	.
RPL39	1000	180	1	34.28	0.1904	1	0.03942
RPL36AL	1001	96	0	.	.	.	0.15083
RPLP0	1002	73	0	8.75	0.1199	1	0.36818
RPLP1	1003	38	0	1.09	0.0287	1	0.23514
RPLP2	1004	40	0	1.52	0.038	1	0.43603
RPS3	1005	1303	2	402.41	0.3088	2	.
RPS3A	1006	59	0	1.49	0.0253	1	.
RPS4X	1007	68	0	22.28	0.3276	2	0.06544
RPS5	1009	54	0	12.98	0.2404	1	0.25488
RPS6	1010	37	0	7.18	0.1941	1	0.3773
RPS7	1011	37	0	5.51	0.1489	1	0.67106
RPS8	1012	55	0	11.23	0.2042	1	0.26353
RPS9	1013	72	0	6.41	0.089	1	0.1002
RPS10	1014	52	0	12.95	0.249	1	0.39157
RPS11	1015	77	0	9.99	0.1297	1	0.34302
RPS12	1016	22	0	2.3	0.1045	1	0.33815
RPS13	1017	41	0	5.6	0.1366	1	0.45474
RPS15	1018	35	0	8.3	0.2371	1	0.04653
RPS15A	1019	54	1	15.61	0.2891	2	0.68131
RPS16	1020	136	0	9.09	0.0668	1	0.30548
RPS17	1021	51	0	13.16	0.258	1	.
RPS19	1022	39	0	8.71	0.2233	1	0.04037
RPS20	1023	281	0	44.41	0.158	1	0.15624
RPS21	1024	54	0	14.98	0.2774	.	.
RPS23	1025	2789	3	810.41	0.2906	2	0.37155
RPS24	1026	90	0	14.28	0.1587	1	0.02181
RPS25	1028	51	0	8.17	0.1602	1	0.33716
RPS26	1029	69	0	17.53	0.2541	1	0.16412
RPS27	1030	62	0	12.02	0.1939	1	0.50219
RPS28	1031	141	0	32.93	0.2335	1	.
RPS29	1032	95	0	5.6	0.0589	1	0.9104
RRM1	1033	542	3	154.85	0.2857	2	0.26591
RRM2	1034	2033	5	552.23	0.2716	.	0.04538
SLC12A2	1046	3057	19	923.42	0.3021	2	0.51993
SRD5A1	1047	1294	3	330.85	0.2557	1	0.05465
SULT1A1	1055	234	0	83.37	0.3563	2	0.27797
TKT	1064	120	0	35.92	0.2993	2	0.30685
TNFRSF1A	1065	555	0	155.85	0.2808	2	0.11651
TOP2A	1067	998	4	230.12	0.2306	1	0.18001
TOP2B	1068	402	1	160.08	0.3982	2	0.99689
TUBB2A	1069	197	0	54.64	0.2774	.	0.20892
TUBG1	1070	197	2	34.09	0.173	1	0.41844
TYMS	1071	502	0	85.82	0.171	1	0.05884
ALDH5A1	1080	3495	8	900.47	0.2576	1	0.03806
PLOD3	1084	304	0	59.98	0.1973	1	0.24934
AAMP	1087	404	0	65.07	0.1611	1	.
ABCA3	1089	796	0	242.03	0.3041	2	0.03262
ABCF1	1090	831	2	205.57	0.2474	1	0.07124
ABR	1092	2562	1	712.91	0.2783	.	0.30663
ACACB	1093	1864	0	447.03	0.2398	1	0.04023
ASIC1	1095	1973	1	418.28	0.212	1	0.43989
ACLY	1096	884	6	248.45	0.2811	2	0.3316
ACO2	1098	376	1	132.12	0.3514	2	0.28991
ACTB	1101	600	1	157.1	0.2618	1	0.75739
ACTN1	1102	736	1	142.12	0.1931	1	0.57591
ACTN2	1103	2012	7	443.1	0.2202	1	0.18892
ACVR1	1105	1085	5	307.18	0.2831	2	0.93949
ACVR2B	1106	9810	19	.	.	.	0.31287
ACYP1	1107	223	1	55.07	0.247	1	0.29324
ADAM10	1110	2343	8	729.97	0.3116	2	.
ADAR	1111	2749	3	489.68	0.1781	1	0.0839
ADARB1	1112	4366	5	1270.18	0.2909	2	0.07346
ADCY9	1116	3126	1	787.13	0.2518	1	0.21031
ADD1	1119	1553	1	391.03	0.2518	1	0.2436
ADD3	1121	1947	6	618.83	0.3178	2	0.70327
PLIN2	1122	487	0	111.05	0.228	1	0.06028
ADK	1123	858	7	263.71	0.3074	2	0.52354
ADM	1124	761	3	199.04	0.2616	1	0.4322
ADSS	1126	1094	4	297.64	0.2721	.	0.49048
AP1B1	1127	1141	0	215.93	0.1892	1	0.15041
AP1G1	1128	4058	7	1204.49	0.2968	2	0.72039
TLE5	1130	909	1	141.05	0.1552	1	.
AMFR	1144	1457	2	297.62	0.2043	1	0.41326
ANK3	1149	3548	10	1062.92	0.2996	2	0.14584
SLC25A4	1151	3413	10	824.69	0.2416	1	0.60091
SLC25A5	1152	338	1	104.93	0.3104	2	0.73428
ANXA4	1153	962	3	225.44	0.2343	1	0.26651
ANXA5	1154	471	2	125.41	0.2663	.	0.06336
ANXA6	1155	742	0	157.07	0.2117	1	0.04787
ANXA7	1156	994	0	326.39	0.3284	2	0.2601
ANXA11	1157	729	0	239.4	0.3284	2	0.15484
APAF1	1160	2867	7	693.84	0.242	1	0.17418
NUDT2	1161	273	0	63.7	0.2333	1	0.03342
APBB1	1164	410	0	142.17	0.3468	2	0.5169
BIRC2	1166	487	3	151.03	0.3101	2	0.125
XIAP	1167	6798	20	1334.65	0.1963	1	0.21023
BIRC5	1168	2081	0	629.32	0.3024	2	0.01465
ARG2	1172	800	4	194.62	0.2433	1	0.33589
ARHGAP5	1173	4780	26	1324.03	0.277	.	0.5901
ARHGDIG	1176	189	0	43.75	0.2315	1	0.05733
ARL1	1177	2520	4	620.44	0.2462	1	0.16021
ARNTL	1178	510	0	147.38	0.289	2	0.99572
ALDH7A1	1182	3124	3	593.17	0.1899	1	0.02399
ATP6AP1	1183	626	1	247.56	0.3955	2	0.04808
ATR	1184	194	1	27.85	0.1436	1	0.20025
BACH1	1186	3315	8	847.76	0.2557	1	0.2449
BAK1	1188	1257	0	381.28	0.3033	2	.
BCAT2	1190	364	0	81.94	0.2251	1	0.2503
BCL2L1	1191	1497	3	360.74	0.241	1	0.55372
BID	1196	1440	2	444.11	0.3084	2	0.03354
BMP4	1202	296	2	69.51	0.2348	1	0.67815
BMPR2	1204	7805	34	.	.	.	0.34174
BNIP1	1205	466	1	139.24	0.2988	2	0.05093
KLF9	1206	3179	8	869.84	0.2736	.	0.6771
BTF3	1207	385	1	93.11	0.2418	1	0.92044
BUB1B	1211	377	4	88.86	0.2357	1	0.13052
C1QBP	1212	236	2	27.67	0.1172	1	0.19855
CA11	1217	177	0	15.92	0.0899	1	0.57798
CALU	1219	4256	9	1263.59	0.2969	2	0.32648
CAMK2D	1221	3513	6	919.66	0.2618	1	0.13296
CAMK2G	1222	2017	5	631.16	0.3129	2	0.68871
CASP2	1224	3013	4	928.58	0.3082	2	0.11196
CASP6	1226	701	1	207.69	0.2963	2	0.02354
CASP7	1227	1369	4	403.63	0.2948	2	0.13256
CASP8	1228	1117	3	194.09	0.1738	1	0.03696
CASP9	1229	1542	1	397.16	0.2576	1	0.00564
CAV2	1233	2420	7	735.23	0.3038	2	0.17151
SERPINH1	1235	721	1	227.38	0.3154	2	0.25156
CBR3	1236	50	0	4.69	0.0938	1	0.16157
CCNA2	1237	1194	3	329.36	0.2758	.	0.32965
CCNE1	1238	540	0	136.51	0.2528	1	0.40512
CCNH	1239	184	1	39.81	0.2164	1	0.05237
CCNT1	1240	4575	15	1246.44	0.2724	.	0.40873
CCNT2	1241	4797	17	1379.36	0.2875	2	0.62594
ENTPD6	1247	2478	4	782.75	0.3159	2	0.0363
ENTPD5	1249	3698	9	1005.87	0.272	.	0.08512
CD68	1251	600	1	124.34	0.2072	1	0.04946
CDC5L	1253	3713	14	1067.15	0.2874	2	0.10642
CDC6	1254	1160	4	211.03	0.1819	1	0.35788
CDC20	1255	74	0	13.1	0.177	1	0.39373
CDC27	1256	3238	14	910.28	0.2811	2	0.69791
CDK3	1258	576	1	108.1	0.1877	1	0.15415
CDK6	1259	****	25	.	.	.	0.20613
CDK8	1260	1157	1	305	0.2636	1	0.95813
CDK9	1261	1230	2	408.09	0.3318	2	0.04354
CDKN2C	1262	364	1	82.97	0.2279	1	0.54373
CDS1	1263	2654	10	729.82	0.275	.	0.14057
CDX2	1265	1047	1	210.29	0.2009	1	0.31573
RCC1	1269	1189	1	344.84	0.29	2	0.20694
CHD1	1270	1176	4	338.8	0.2881	2	0.54568
CHD2	1271	3302	4	1129.43	0.342	2	0.18654
CHD4	1273	594	0	137.31	0.2312	1	.
CHEK1	1274	1827	9	530.42	0.2903	2	0.13608
CHKA	1277	1129	1	313.11	0.2773	.	0.16054
CHUK	1278	1300	9	254.79	0.196	1	0.32789
CIRBP	1280	729	2	230.29	0.3159	2	0.04789
TBCB	1281	165	0	40.32	0.2444	1	0.10019
AP2B1	1282	2718	1	670.7	0.2468	1	0.23751
AP1S1	1283	710	0	180.14	0.2537	1	0.3546
AP3S1	1284	591	1	187.12	0.3166	2	0.90399
CLCN6	1286	2921	3	648.97	0.2222	1	0.10794
CLCN7	1287	1698	0	449.88	0.2649	1	0.01378
CLIC1	1288	261	0	28.42	0.1089	1	0.31757
CLNS1A	1293	567	2	143.66	0.2534	1	0.15059
CLPTM1	1294	449	1	83.01	0.1849	1	0.5092
KLF6	1300	3543	6	962.57	0.2717	.	0.7631
COX10	1303	1466	2	263.44	0.1797	1	0.01767
CPD	1304	4843	11	1586.55	0.3276	2	0.49959
CREBL2	1310	3110	12	887.99	0.2855	2	0.3566
CRMP1	1313	996	0	301.16	0.3024	2	0.34521
CSE1L	1316	522	1	111.64	0.2139	1	0.46182
CSNK1G2	1319	1135	3	338.62	0.2983	2	0.28875
CSNK2B	1320	144	0	34.92	0.2425	1	0.74657
CSRP2	1321	237	0	52.78	0.2227	1	0.20951
CSTF1	1324	799	1	173.7	0.2174	1	0.08304
CSTF2	1325	225	0	70.51	0.3134	2	0.12724
CSTF3	1326	503	1	133.06	0.2645	1	0.85019
CTBP1	1328	800	1	178.86	0.2236	1	0.62141
CTBP2	1329	1669	4	479.46	0.2873	2	0.76293
CTNND1	1331	2872	6	765.35	0.2665	.	0.49005
CTSV	1333	3272	3	808.29	0.247	1	0.52054
CTSZ	1336	462	1	93.7	0.2028	1	.
CXADR	1338	4419	18	1261.21	0.2854	2	0.15773
DAD1	1344	275	2	56.08	0.2039	1	0.12307
DGKA	1345	255	1	41.67	0.1634	1	.
DAPK3	1348	648	0	160.64	0.2479	1	0.0316
DARS	1349	1435	1	470.72	0.328	2	0.27708
DAXX	1350	185	0	47.83	0.2585	1	0.21751
DBP	1352	277	1	52.99	0.1913	1	.
DDT	1355	186	0	46.21	0.2484	1	0.08312
DDX3X	1356	2568	8	863.8	0.3364	2	0.98559
DHX9	1357	548	0	158.49	0.2892	2	0.63099
DHX15	1358	460	2	108.45	0.2358	1	0.99273
DECR1	1359	102	0	20.72	0.2031	1	0.04649
DHCR7	1360	964	2	257.31	0.2669	.	0.00875
DHODH	1361	1218	4	358.79	0.2946	2	0.02235
DKC1	1363	822	0	203.57	0.2477	1	0.0811
DNASE2	1375	779	0	138.71	0.1781	1	0.18253
DYNC1H1	1376	235	2	59.73	0.2542	1	0.08315
DYNC2H1	1377	610	1	221.9	0.3638	2	0.06336
DYNC1I2	1378	2269	3	602.54	0.2656	.	0.15463
DNMT1	1379	323	1	116.03	0.3592	2	0.57401
DOCK1	1380	1090	1	354.19	0.3249	2	0.25439
DOK1	1381	437	1	97.4	0.2229	1	0.06989
DPAGT1	1382	495	0	114.83	0.232	1	0.14002
DPH1	1383	845	0	231.71	0.2742	.	.
DPH2	1384	832	1	206.57	0.2483	1	0.06899
DPYSL2	1386	2471	2	584.5	0.2365	1	0.35761
DRG2	1388	745	1	148.82	0.1998	1	0.0013
DTNA	1390	4110	5	1019.63	0.2481	1	0.35262
DUSP9	1395	1021	1	265.57	0.2601	1	0.17605
DYRK1A	1396	2845	8	730.69	0.2568	1	0.3551
ECE1	1397	2708	3	801.15	0.2958	2	0.12522
ECH1	1398	191	0	29.27	0.1532	1	0.03876
LPAR1	1401	1647	3	502.89	0.3053	2	0.33879
EEF1A1	1402	2060	5	568.81	0.2761	.	0.10993
EEF1G	1404	78	0	21.71	0.2783	.	0.87423
EFNB3	1406	1799	0	423.34	0.2353	1	0.53894
CELSR3	1407	1742	0	333.91	0.1917	1	0.39533
CELSR2	1408	1707	5	394.15	0.2309	1	0.6808
EIF1AX	1412	3788	14	1275.92	0.3368	2	0.15707
EIF2B1	1414	733	1	218.64	0.2983	2	.
EIF2S3	1415	2025	2	728.15	0.3596	2	0.07295
EIF4A1	1416	520	1	92.28	0.1775	1	0.76433
EIF4B	1417	1992	7	426.34	0.214	1	0.43276
EIF4G2	1418	770	2	221.77	0.288	2	0.99966
ELAVL1	1419	4910	6	1488.12	0.3031	2	0.35255
ELF4	1421	1801	3	463.37	0.2573	1	0.0707
EMP2	1424	4483	5	734.37	0.1638	1	0.08228
EMP3	1425	83	0	7.68	0.0925	1	0.14319
EN2	1427	2144	5	431.35	0.2012	1	0.42331
ENO1	1428	360	0	118	0.3278	2	0.13203
EP300	1429	1121	1	306.65	0.2736	.	0.89124
EPAS1	1430	2043	5	405.41	0.1984	1	0.44505
EPB41L2	1431	1257	6	361.63	0.2877	2	0.07108
ERN1	1433	958	0	193.5	0.202	1	0.1105
FBL	1436	85	0	24.63	0.2898	2	0.34932
EXTL2	1439	1570	2	421.53	0.2685	.	0.33519
EXTL3	1440	2824	4	849.52	0.3008	2	0.15647
FABP5	1444	210	0	46.49	0.2214	1	.
GPC4	1448	1831	4	568.49	0.3105	2	0.52073
FHL1	1449	1334	3	389.82	0.2922	2	0.30249
FHL2	1450	457	2	126.28	0.2763	.	0.10497
FOXF2	1452	738	1	184.7	0.2503	1	0.35003
FOXC1	1453	1790	6	326.13	0.1822	1	0.60597
FOXO3	1455	4976	6	1195.92	0.2403	1	0.13967
FLNA	1456	317	0	83.33	0.2629	1	0.23414
FLNB	1457	1493	1	436.57	0.2924	2	0.08026
FLNC	1458	751	0	190.52	0.2537	1	0.33565
FZD2	1466	1876	4	.	.	.	0.27478
SLC37A4	1467	559	1	86.85	0.1554	1	0.19458
XRCC6	1469	233	0	57.87	0.2484	1	0.22754
GABBR1	1470	1315	1	213.54	0.1624	1	0.07373
B4GALNT1	1478	849	0	260.06	0.3063	2	0.38031
GAS8	1481	1626	1	353.4	0.2173	1	0.1246
NIPSNAP2	1483	1110	4	284.51	0.2563	1	.
BLOC1S1	1487	98	0	22.8	0.2327	1	0.09798
TADA2A	1488	139	0	44.88	0.3229	2	0.26436
NR6A1	1489	5430	7	1396	0.2571	1	0.39009
GDI1	1493	795	2	248.38	0.3124	2	0.44121
GDI2	1494	783	2	257.44	0.3288	2	0.21623
B4GALT1	1497	2813	4	830.6	0.2953	2	0.31074
GCLC	1498	1415	2	382.6	0.2704	.	0.30545
GLE1	1499	163	0	43.1	0.2644	1	0.04253
GMDS	1500	369	0	101.28	0.2745	.	0.16228
GSTA4	1512	522	2	85.3	0.1634	1	0.0713
GTF2B	1514	575	3	224.48	0.3904	2	0.3603
GTF2H2	1515	553	4	140.38	0.2539	1	.
GTF2H3	1516	2369	4	505.22	0.2133	1	0.07483
GTF2H4	1517	120	1	41.83	0.3486	2	0.30893
GTF2I	1518	1162	1	366.75	0.3156	2	.
BRF1	1519	1265	1	258.08	0.204	1	.
GTF3C1	1520	737	1	170.83	0.2318	1	0.06013
GTF3C2	1521	826	0	166.08	0.2011	1	0.77556
HDAC2	1527	4902	14	1326.25	0.2706	.	0.95658
HIF1A	1530	1174	8	346.22	0.2949	2	0.97334
SLC29A2	1532	915	0	204.62	0.2236	1	0.11759
HNRNPL	1533	334	0	73.01	0.2186	1	0.69643
PRMT2	1535	797	0	166.52	0.2089	1	0.05563
PRMT1	1536	205	1	31.38	0.1531	1	0.51749
HSBP1	1537	1584	1	346.21	0.2186	1	0.08167
DNAJA1	1539	1004	5	284.16	0.283	2	0.70303
HSPB1	1540	124	1	25.53	0.2059	1	0.24177
IGSF3	1542	2914	3	629.47	0.216	1	0.2446
NDST1	1543	4879	5	1188.89	0.2437	1	0.18423
ID4	1546	3005	6	933.52	0.3107	2	0.57052
IFIT1	1548	2775	4	806.13	0.2905	2	0.02488
IFRD1	1550	1684	11	513.41	0.3049	2	0.12585
IGBP1	1551	343	0	100.83	0.294	2	0.13449
IKBKB	1556	1674	1	447.13	0.2671	.	0.04277
IL13RA1	1560	2679	7	719.55	0.2686	.	0.07874
ING2	1564	1476	4	324.69	0.22	1	0.61546
INPP4A	1566	65	0	9.82	0.1511	1	0.19096
INPPL1	1567	794	3	130.8	0.1647	1	.
EIF3E	1568	142	0	31.56	0.2223	1	0.34389
IRAK1	1569	1353	0	402	0.2971	2	0.04778
IRF3	1571	79	0	14.89	0.1885	1	.
AARS	1605	327	0	52.78	0.1614	1	0.13287
ABCA2	1606	695	1	172.33	0.248	1	0.21415
ACAA1	1607	337	1	117.02	0.3472	2	0.0051
ACADSB	1609	4525	10	840.27	0.1857	1	0.10648
ACP2	1610	814	0	234.93	0.2886	2	0.2337
ACTA2	1613	149	0	22.76	0.1528	1	0.37558
ACTG1	1614	719	2	171.95	0.2392	1	0.62036
ACVR2A	1616	3553	20	927.65	0.2611	1	0.74521
ADD2	1617	1341	2	207.43	0.1547	1	0.09432
PARP1	1618	769	2	264.19	0.3436	2	0.15378
GRK2	1619	1108	1	326.67	0.2948	2	.
AHNAK	1620	842	0	250.7	0.2977	2	0.35632
AHR	1621	3087	9	678.4	0.2198	1	0.24486
AK2	1625	1956	1	517.53	0.2646	1	0.16695
AKT2	1626	3555	2	737.56	0.2075	1	0.08124
ALCAM	1627	2462	9	672.86	0.2733	.	0.37561
AKR1B1	1628	378	0	98.82	0.2614	1	0.05597
AMD1	1634	2097	6	527.57	0.2516	1	0.24132
AMPH	1635	1122	3	237.64	0.2118	1	0.55835
APEH	1640	159	0	19.69	0.1238	1	0.14356
APEX1	1641	264	0	35.53	0.1346	1	.
APLP2	1642	1363	1	297.12	0.218	1	0.38098
APOC1	1645	119	0	10.02	0.0842	1	.
ARAF	1654	464	0	117.95	0.2542	1	0.55461
ARCN1	1655	2319	3	539.94	0.2328	1	0.36987
TRIM23	1656	2089	10	562.6	0.2693	.	0.29582
ARF1	1658	1199	2	320.45	0.2673	.	0.65855
ARF3	1659	2738	5	677.34	0.2474	1	0.37326
ARF4	1660	849	4	212.06	0.2498	1	0.93638
ARL4D	1661	798	1	.	.	.	0.25786
ARF5	1662	406	0	80.48	0.1982	1	0.85275
ARF6	1663	2790	6	.	.	.	0.75474
RHOA	1664	1073	3	217.89	0.2031	1	0.77726
RHOG	1665	585	0	.	.	.	0.69353
ARL2	1667	330	0	88.77	0.269	.	0.16021
ARNT	1668	2316	6	587.19	0.2535	1	0.53284
ASNS	1673	142	0	12.19	0.0858	1	0.08454
ATF3	1674	1222	3	308.95	0.2528	1	0.22521
ATF4	1675	84	0	28.5	0.3393	2	0.5533
ATP1B1	1677	1167	5	283.22	0.2427	1	0.891
ATP1B3	1679	847	2	262.33	0.3097	2	0.571
ATP2A2	1681	788	5	209.83	0.2663	.	0.39001
ATP2B1	1682	2935	12	790.64	0.2694	.	0.865
ATP2B4	1684	4227	6	915.42	0.2166	1	.
ATP5PF	1685	160	0	18.89	0.1181	1	.
ATP5F1B	1686	148	1	33.16	0.2241	1	.
ATP5F1D	1687	388	0	38.45	0.0991	1	.
ATP5PB	1688	924	0	198.86	0.2152	1	.
ATP5MC3	1689	2030	1	579.28	0.2854	2	.
ATP6V1A	1690	2631	7	437.53	0.1663	1	0.34138
ATP6V1B2	1693	1294	0	344.05	0.2659	.	0.31628
ATP6V0C	1694	478	2	128.62	0.2691	.	0.51694
ATP6V1C1	1695	4310	13	1223.88	0.284	2	0.13469
ATP6V1E1	1696	538	4	164.71	0.3062	2	0.13391
ATP5PO	1697	73	0	9.19	0.1259	1	.
AUH	1698	533	3	101.63	0.1907	1	0.3338
BCL7B	1707	945	1	177.72	0.1881	1	0.44733
OPN1SW	1708	51	0	7.08	0.1388	1	.
BICD1	1714	580	7	115.81	0.1997	1	0.11981
BMP6	1718	1385	3	508.61	0.3672	2	0.28124
BMP7	1719	2206	5	489.88	0.2221	1	0.1284
BMP8B	1720	3237	5	974.11	0.3009	2	0.00504
POLR3D	1722	649	2	189.09	0.2914	2	0.09208
DST	1723	941	4	224.78	0.2389	1	0.73004
BPGM	1724	785	4	281.33	0.3584	2	0.10126
BSG	1728	749	0	169.84	0.2268	1	0.02325
KLF5	1730	1656	5	412.45	0.2491	1	0.68078
BTG1	1731	3802	5	878.57	0.2311	1	.
CALM2	1743	694	2	205.86	0.2966	2	0.9979
CAMK4	1744	****	44	.	.	.	0.1571
CAMLG	1745	1210	3	425.91	0.352	2	0.11969
CANX	1746	2997	6	918.18	0.3064	2	0.43664
CAPN2	1748	1161	3	228.19	0.1965	1	0.11716
CAPNS1	1749	514	0	111.32	0.2166	1	.
CAST	1750	2067	4	587.09	0.284	2	0.1623
CARS	1751	192	0	35.51	0.1849	1	0.21061
CAT	1752	627	4	151.74	0.242	1	0.11607
CAV1	1753	1898	3	591.04	0.3114	2	0.51611
CBFB	1755	2326	9	494.06	0.2124	1	0.76917
CBR1	1757	295	1	77.5	0.2627	1	0.27177
CCND2	1759	5347	8	1365.01	0.2553	1	0.40569
CCND3	1760	1007	2	347.06	0.3446	2	0.43551
CCNF	1761	1838	1	274.03	0.1491	1	0.06631
CCT6A	1762	904	2	294.75	0.3261	2	0.09515
CD9	1769	443	0	147.5	0.333	2	0.53632
ENTPD1	1776	****	20	.	.	.	0.11154
CD47	1777	4194	17	1059.45	0.2526	1	0.44434
CD58	1779	279	0	73.68	0.2641	1	0.02684
CD63	1780	118	0	20.01	0.1696	1	0.40364
ADGRE5	1784	604	0	96.2	0.1593	1	.
CDK1	1786	877	5	192.04	0.219	1	0.42077
CDK11B	1787	523	0	72.96	0.1395	1	.
CDC25A	1789	1767	2	362.54	0.2052	1	.
CDC25C	1790	427	0	105.78	0.2477	1	0.03965
CDC42	1791	1426	1	409.56	0.2872	2	0.81295
CDH2	1792	1190	1	361.21	0.3035	2	0.96041
CDK2	1798	1164	2	285.61	0.2454	1	0.31995
CDK7	1799	295	1	115.2	0.3905	2	0.58103
CDKN2D	1800	596	3	149.27	0.2505	1	0.35352
CDR2	1802	1029	3	248.04	0.241	1	0.18802
CEBPG	1806	2994	9	.	.	.	0.18395
CENPA	1809	825	3	231.14	0.2802	2	.
CENPB	1810	833	0	.	.	.	0.70743
CENPC	1812	334	1	120.81	0.3617	2	0.11103
CENPE	1813	416	2	155.12	0.3729	2	0.08879
CTSC	1814	414	0	120.19	0.2903	2	0.02557
CHML	1821	4932	23	.	.	.	.
CHN1	1822	802	3	208.15	0.2595	1	0.79968
CKB	1823	206	0	47.68	0.2315	1	0.65677
CKS1B	1826	472	2	74.75	0.1584	1	0.12676
CKS2	1827	278	2	63.95	0.23	1	0.72413
CLCN3	1829	3190	7	985.02	0.3088	2	0.43308
CLU	1831	1324	1	400.89	0.3028	2	0.07798
CLTA	1833	288	0	88.58	0.3076	2	0.91401
CLTB	1834	319	1	52.61	0.1649	1	0.39983
CLTCL1	1835	517	1	82.91	0.1604	1	0.14859
CNN3	1839	793	5	174.89	0.2205	1	0.82199
CNTN1	1843	2377	7	736.19	0.3097	2	0.73646
COL2A1	1844	442	2	106.76	0.2415	1	0.92848
COL4A1	1845	1405	1	319.49	0.2274	1	0.48218
COL4A2	1846	1018	1	282.27	0.2773	.	0.06213
COL4A6	1847	1393	0	482.42	0.3463	2	0.13663
COL6A1	1848	1036	0	225.34	0.2175	1	0.01802
COL6A2	1849	297	0	79.4	0.2673	.	0.01968
SLC31A1	1859	4019	5	1092.55	0.2718	.	0.2544
SLC31A2	1860	1225	1	332.69	0.2716	.	0.13084
COX4I1	1861	129	1	27.39	0.2123	1	0.16993
COX5B	1862	86	0	6.36	0.074	1	0.26232
COX6B1	1863	137	0	24.32	0.1775	1	0.50188
COX7A2	1865	255	1	66.39	0.2604	1	0.517
COX7B	1866	123	0	11.62	0.0945	1	0.03068
COX7C	1867	126	1	41.3	0.3278	2	0.08795
CPE	1873	937	4	152.65	0.1629	1	0.41519
CPS1	1875	1122	4	379.66	0.3384	2	0.1212
CPT1A	1876	2761	6	552.82	0.2002	1	0.00968
CRABP2	1878	420	0	88.68	0.2111	1	0.11527
ATF2	1880	2359	7	738.41	0.313	2	0.88829
CREM	1881	518	2	120.17	0.232	1	.
CRYZ	1889	810	4	174.77	0.2158	1	0.08226
CSNK1A1	1892	959	2	213.07	0.2222	1	0.56502
CSNK1D	1893	2120	0	532.35	0.2511	1	0.14225
CSNK1E	1894	1280	1	328.11	0.2563	1	.
CSNK2A1	1895	1267	6	265.53	0.2096	1	0.76533
CSNK2A2	1896	464	0	98.92	0.2132	1	0.34283
CTH	1902	724	4	168.28	0.2324	1	0.06837
CTNNA1	1903	945	3	197.75	0.2093	1	0.52772
CTNNB1	1904	1106	1	289.11	0.2614	1	0.93747
CTPS1	1905	917	0	232.6	0.2537	1	0.09618
CTSB	1908	2601	1	451.28	0.1735	1	0.03929
CTSD	1909	751	0	106.97	0.1424	1	0.03281
CTSL	1912	362	1	58.47	0.1615	1	0.12251
CUX1	1913	868	1	228.15	0.2628	1	0.11354
CYB5A	1914	424	1	82.61	0.1948	1	0.06402
CYB561	1915	2098	0	477.71	0.2277	1	0.08589
CYC1	1916	191	0	27.17	0.1423	1	0.08971
DBT	1918	9333	17	.	.	.	0.09519
ECI1	1919	107	0	18.76	0.1753	1	0.00119
DCTD	1921	1308	1	283.2	0.2165	1	0.19538
DDB1	1923	689	1	212.18	0.308	2	0.36531
GADD45A	1924	564	2	125.7	0.2229	1	0.88221
DHPS	1930	121	1	40.26	0.3327	2	0.12559
DLAT	1931	1743	12	501.87	0.2879	2	0.3224
DLST	1933	1417	1	266.97	0.1884	1	.
DLX4	1934	1016	4	246.9	0.243	1	0.07872
DR1	1938	1953	3	409.18	0.2095	1	0.30089
ATN1	1940	541	1	102.13	0.1888	1	0.45381
DSC3	1941	4810	11	1345.97	0.2798	.	0.08601
DSG2	1943	2265	7	626.18	0.2765	.	0.06748
DUSP7	1947	1896	0	542.47	0.2861	2	0.34308
DUT	1948	1295	4	203.5	0.1571	1	0.06546
E2F3	1949	3284	9	876.53	0.2669	.	0.68657
E2F4	1950	795	4	229.48	0.2887	2	0.311
E2F5	1951	656	2	138.61	0.2113	1	0.58298
DDR1	1954	860	0	311.5	0.3622	2	0.31617
EEF1A2	1958	286	0	44.75	0.1565	1	0.97126
EEF1B2	1959	46	1	7.79	0.1693	1	0.45662
EEF1D	1960	70	0	19.94	0.2849	2	0.11902
EEF2	1961	498	1	108.66	0.2182	1	0.24123
EFNA5	1962	4366	6	1116	0.2556	1	0.65406
EHHADH	1966	1602	0	451.57	0.2819	2	0.01326
EIF4A2	1967	628	4	151.96	0.242	1	0.99837
EIF4E	1968	9344	14	.	.	.	0.74323
EIF5	1969	3973	5	775.95	0.1953	1	0.22588
EIF5A	1970	653	1	153.54	0.2351	1	0.68149
ELK4	1973	8603	26	.	.	.	0.13724
ENO2	1975	896	4	306.61	0.3422	2	0.22095
EPHX2	1979	400	1	65.23	0.1631	1	0.05157
STX2	1980	2300	6	683.58	0.2972	2	0.06517
EPS15	1981	2437	8	613.92	0.2519	1	0.53007
ERCC1	1983	2342	1	450.28	0.1923	1	0.19073
ESD	1984	160	0	33.61	0.2101	1	0.06133
ETFB	1985	56	0	2.23	0.0398	1	0.3381
EYA3	1990	4122	6	1194.72	0.2898	2	0.18384
EZH1	1991	2257	0	539.19	0.2389	1	0.1379
F2R	1992	2277	8	752.93	0.3307	2	0.05427
ACSL1	1995	1530	2	378.46	0.2474	1	.
FBLN1	1996	96	0	22.02	0.2294	1	0.1253
FAU	1997	54	0	6.25	0.1157	1	0.30228
FBN2	1999	1546	5	463.1	0.2995	2	0.75212
FDPS	2004	57	0	7.28	0.1277	1	0.17089
FGF2	2006	5839	18	1559.67	0.2671	.	0.14919
FGFR4	2011	466	0	116.3	0.2496	1	0.10759
FHIT	2012	2307	0	533.56	0.2313	1	0.0524
FKBP3	2013	599	2	128.93	0.2152	1	0.28269
FKBP4	2014	2165	3	469.3	0.2168	1	0.11713
FOXO1	2015	3385	8	952.32	0.2813	2	0.44351
FLII	2018	323	0	102.82	0.3183	2	0.15549
FLT4	2020	528	0	124.48	0.2358	1	0.05752
FMR1	2024	2283	3	635.56	0.2784	.	0.88246
FN1	2026	1115	4	303.99	0.2726	.	0.70329
FNTA	2027	506	0	108.51	0.2144	1	0.45468
FNTB	2028	1340	1	329.82	0.2461	1	0.21207
FTH1	2032	442	1	100.07	0.2264	1	0.22779
KDSR	2035	4044	9	1053.44	0.2605	1	0.10764
FYN	2037	1407	5	355.71	0.2528	1	0.82059
IFI6	2038	320	0	52.36	0.1636	1	.
GAB1	2039	5376	24	1225.71	0.228	1	0.22963
GABPA	2040	3228	11	710.71	0.2202	1	0.38761
GABPB1	2041	140	1	27.04	0.1931	1	.
GALK2	2044	1646	5	450.74	0.2738	.	0.17296
GAPDH	2046	205	0	60.2	0.2937	2	0.45543
GARS	2047	173	0	39.01	0.2255	1	0.45654
GAS1	2048	1380	3	.	.	.	0.44
GATA4	2052	1527	3	446.66	0.2925	2	0.17379
GFPT1	2056	6420	23	1427.06	0.2223	1	0.12657
GCLM	2061	3791	11	996.56	0.2629	1	0.20571
GLRX	2064	1115	4	356.97	0.3202	2	0.01335
GLUL	2065	6312	10	1426.7	0.226	1	0.32092
GNA11	2067	2823	1	782.47	0.2772	.	0.13662
GNAI1	2069	1916	7	430.3	0.2246	1	0.46307
GNAI2	2070	1011	1	251.61	0.2489	1	0.44864
GNAQ	2072	5049	16	1143.89	0.2266	1	0.63719
GNAZ	2073	1603	5	425.39	0.2654	.	0.36696
GNB1	2074	1778	2	598.36	0.3365	2	0.52871
GNB3	2075	497	0	100.33	0.2019	1	0.09031
GNS	2076	3299	4	895.49	0.2714	.	0.13814
GOLGA1	2077	2236	4	474.75	0.2123	1	0.26204
GOLGA4	2078	833	4	140.42	0.1686	1	.
GOT1	2079	677	2	166.38	0.2458	1	0.25187
GOT2	2080	1040	3	229.31	0.2205	1	0.24796
GPC1	2081	1788	2	444.59	0.2487	1	0.08139
GRK6	2082	1022	2	159.22	0.1558	1	0.36601
GPX3	2084	863	0	196.02	0.2271	1	0.16963
GPX4	2085	217	0	44.52	0.2052	1	.
GRB2	2086	2292	3	484.69	0.2115	1	0.28619
GRN	2087	308	0	44.75	0.1453	1	0.30179
GRSF1	2092	5105	10	1191.88	0.2335	1	0.18427
GSK3B	2093	4835	11	1490.64	0.3083	2	0.69258
GSPT1	2094	4991	13	1552.08	0.311	2	0.37264
GTF2E2	2095	407	1	86.31	0.2121	1	0.17248
GTF2F1	2096	712	0	155.54	0.2185	1	0.01427
GTF3A	2097	112	0	22.57	0.2015	1	0.13803
GYPC	2101	533	0	100.25	0.1881	1	0.10332
GYS1	2103	1163	2	231.25	0.1988	1	0.16594
H2AFX	2105	1089	1	.	.	.	0.08294
H2AFZ	2106	375	1	93.05	0.2481	1	0.99921
HARS	2109	353	0	63.59	0.1801	1	0.19595
HTT	2111	3901	3	1205.27	0.309	2	0.04736
HIVEP1	2114	538	1	109.61	0.2037	1	0.94931
HLA-A	2116	429	1	112.71	0.2627	1	.
HLA-C	2117	420	0	62.09	0.1478	1	.
HLA-DMB	2118	342	0	101.94	0.2981	2	.
HLA-DOA	2119	2656	1	543.86	0.2048	1	.
HLA-DQB1	2123	772	0	228.6	0.2961	2	.
HMGB1	2128	3441	14	803.04	0.2334	1	0.27175
HMGB2	2129	704	2	243.9	0.3464	2	0.18249
HMGCS1	2130	3661	11	1138.56	0.311	2	0.26118
HMGA1	2131	1347	0	276.24	0.2051	1	0.18709
HMOX1	2133	616	0	102.51	0.1664	1	0.10921
HMOX2	2134	591	0	118.79	0.201	1	0.47917
NR4A1	2135	563	3	80.76	0.1434	1	0.53882
HNRNPA1	2136	702	2	235.88	0.336	2	.
HNRNPA2B	2137	2424	10	802.02	0.3309	2	0.85791
HNRNPD	2138	871	1	160.4	0.1842	1	0.57236
RBMX	2139	696	1	154.72	0.2223	1	0.07866
HNRNPK	2140	1324	1	360.16	0.272	.	0.85387
HOXA4	2141	718	6	155.18	0.2161	1	0.44331
HOXB2	2145	413	2	89.9	0.2177	1	0.56095
HOXB3	2146	1464	6	343.22	0.2344	1	0.61739
HOXB5	2147	952	2	206.34	0.2167	1	0.69131
HOXD10	2148	711	4	180.95	0.2545	1	0.88103
HPCAL1	2149	796	2	264.22	0.3319	2	0.25317
HSPA4	2154	581	1	139.74	0.2405	1	0.34869
HSPA6	2155	307	1	.	.	.	0.09563
HSPD1	2156	462	1	76.87	0.1664	1	0.89743
HSPE1	2157	204	0	58.36	0.2861	2	0.66974
FOXN2	2158	3852	14	1055.74	0.2741	.	0.27226
IARS	2161	600	2	200.12	0.3335	2	0.24127
ICAM3	2162	81	0	22.12	0.2731	.	0.08724
ID1	2165	421	1	88.76	0.2108	1	0.32852
ID2	2166	776	3	196.7	0.2535	1	0.66429
ID3	2167	511	1	82.71	0.1619	1	0.61094
IDH2	2168	288	2	66.47	0.2308	1	0.17356
IGHMBP2	2180	870	2	251.03	0.2885	2	0.02161
IL6ST	2184	5987	21	1789.32	0.2989	2	0.12237
INPP1	2194	263	0	43.2	0.1643	1	0.27527
ACO1	2197	725	1	283.25	0.3907	2	0.09144
ISL1	2202	1120	5	255.56	0.2282	1	0.93178
ITGA2	2203	4180	15	865.15	0.207	1	0.06571
ITGA5	2205	1032	2	271.36	0.2629	1	0.60923
ITGA7	2206	490	1	102.38	0.2089	1	0.18609
ITGAE	2208	222	1	59.79	0.2693	.	0.00712
ITGAV	2210	3610	21	1035.45	0.2868	2	0.17672
ITGB1	2211	1252	4	363.92	0.2907	2	0.11737
EIF6	2212	291	0	73.94	0.2541	1	0.11129
ITGB5	2213	1675	1	445.56	0.266	.	0.03233
ITPR2	2223	4060	11	969.37	0.2388	1	0.14402
ITPR3	2224	794	1	180.58	0.2274	1	0.16977
IVD	2225	3050	1	831.4	0.2726	.	0.05718
JAG2	2226	1714	1	560.82	0.3272	2	0.38076
JAK1	2227	1339	2	385.82	0.2881	2	0.19688
JUN	2228	1284	3	.	.	.	0.58999
JUNB	2229	496	2	.	.	.	0.66639
JUP	2230	1137	0	344.41	0.3029	2	0.17405
KCNG1	2237	383	0	70.53	0.1842	1	0.04624
KCNK1	2245	982	7	276.65	0.2817	2	0.24149
KIF3C	2254	2392	4	601.89	0.2516	1	0.27614
KIFC1	2263	234	0	79.57	0.34	2	0.08424
KPNA1	2264	5084	15	1300.38	0.2558	1	0.46016
KPNB1	2265	1234	2	.	.	.	0.75175
KPNA2	2266	263	0	62.35	0.2371	1	0.20168
KPNA3	2267	2493	8	464.06	0.1861	1	0.92993
KPNA4	2268	7109	16	1516.32	0.2133	1	.
KPNA5	2269	407	3	103.55	0.2544	1	0.26829
TNPO1	2270	5715	25	1372.65	0.2402	1	0.45905
IPO5	2271	2474	5	679.63	0.2747	.	0.3652
KRT8	2273	241	0	89.06	0.3695	2	0.11632
LAMA4	2290	1506	2	349.88	0.2323	1	0.22931
LAMB1	2291	150	1	27.76	0.1851	1	0.50995
LAMB2	2292	112	0	19.71	0.176	1	0.17711
LAMC1	2293	2802	7	997.03	0.3558	2	0.39997
LAMP2	2294	5175	16	1225.58	0.2368	1	0.17742
RPSA	2295	174	1	28.85	0.1658	1	0.0976
LBR	2296	1801	5	565.43	0.314	2	0.28479
LDHB	2300	200	1	56.78	0.2839	2	0.26322
LDHC	2301	119	0	30.77	0.2586	1	0.10573
LEPR	2303	478	1	96.88	0.2027	1	0.03495
LGALS1	2305	53	0	7.65	0.1443	1	0.43529
LGALS3	2306	159	0	21.37	0.1344	1	0.24285
LIFR	2310	6632	28	1793.07	0.2704	.	0.11732
LIG3	2311	124	1	23.54	0.1898	1	0.12289
LIG4	2312	1091	5	.	.	.	0.04338
ABLIM1	2313	5150	10	1413.1	0.2744	.	0.08097
LIMK1	2314	1224	0	330.18	0.2698	.	0.32175
LMX1B	2316	4581	2	896.28	0.1957	1	0.10911
LOX	2317	3548	11	884.07	0.2492	1	0.26868
LRCH4	2319	1096	1	340.52	0.3107	2	.
LRP3	2333	1292	2	345.68	0.2676	.	0.1339
LRP4	2334	2266	5	806.43	0.3559	2	0.26135
LRP5	2335	205	2	38.07	0.1857	1	0.79025
LRP6	2336	5101	18	1216.61	0.2385	1	0.31799
LRPAP1	2337	9377	5	.	.	.	0.20801
LSS	2340	1980	0	410.01	0.2071	1	0.03835
LY6E	2346	621	0	231.84	0.3733	2	0.05609
LYN	2350	2337	7	612.42	0.2621	1	0.11937
CD46	2389	2039	5	494.34	0.2424	1	0.02726
ADAM11	2390	2092	1	610.66	0.2919	2	0.30595
SLC3A2	2394	190	0	43.58	0.2294	1	0.24804
MNAT1	2431	331	3	66.95	0.2023	1	0.53154
NUDT1	2452	144	0	45.75	0.3177	2	0.00097
PPP1R12A	2480	2366	8	691.97	0.2925	2	0.91903
PPP1R12B	2481	8009	16	.	.	.	.
NASP	2482	765	0	103.39	0.1352	1	0.32685
NUBP1	2484	246	0	49.99	0.2032	1	0.04545
NBN	2485	2246	4	516.04	0.2298	1	0.09082
NCBP1	2486	2549	4	541.77	0.2125	1	0.13237
NDUFA2	2488	224	0	74.1	0.3308	2	0.45647
NDUFA4	2489	1683	3	617.81	0.3671	2	0.10209
NDUFA6	2490	657	0	199.33	0.3034	2	0.14542
NDUFB3	2491	135	1	42.44	0.3144	2	0.19374
NDUFB5	2492	460	1	123.37	0.2682	.	0.16673
NDUFB6	2493	350	3	113.77	0.3251	2	0.18618
NDUFC1	2494	196	0	55.73	0.2843	2	0.05581
NDUFS4	2495	120	1	14.14	0.1178	1	0.95832
NDUFS8	2496	54	0	1.63	0.0302	1	0.21767
NEK2	2497	654	4	201.78	0.3085	2	0.14949
NEK3	2498	499	2	120.16	0.2408	1	.
NEO1	2499	2510	5	624.45	0.2488	1	0.42614
NFIX	2501	4182	3	1186.76	0.2838	2	0.38235
NFKB2	2502	153	1	30.11	0.1968	1	.
NFKBIB	2503	62	0	14.23	0.2295	1	.
NFX1	2504	1185	1	289.06	0.2439	1	0.11771
NFYA	2505	4997	10	1427.76	0.2857	2	.
NID1	2508	2037	4	561.42	0.2756	.	0.10681
NME2	2512	140	0	32.25	0.2304	1	0.5698
NME3	2513	329	0	89.48	0.272	.	0.03275
NPAS1	2517	124	0	22.53	0.1817	1	.
NPAT	2519	1552	6	391.6	0.2523	1	0.18262
NPM1	2520	319	0	69.34	0.2174	1	0.14216
NPTX1	2522	3980	3	1169.36	0.2938	2	0.33463
NPTX2	2523	1240	2	276.01	0.2226	1	0.21372
NRAS	2524	3630	4	850.89	0.2344	1	0.33875
NRDC	2525	44	0	3.66	0.0832	1	.
NTHL1	2528	109	0	16.11	0.1478	1	.
NUP88	2532	1373	5	315.31	0.2297	1	.
NVL	2533	292	0	67.63	0.2316	1	0.04989
TBC1D25	2536	1634	2	411.04	0.2516	1	0.07908
OAZ2	2537	1130	2	343.91	0.3043	2	0.52253
OCLN	2538	4433	16	1214.47	0.274	.	0.11835
ODC1	2539	353	0	66.65	0.1888	1	0.84082
ODF2	2540	1037	3	195.97	0.189	1	0.08308
OGDH	2541	1071	3	150.19	0.1402	1	0.1344
OGG1	2542	257	0	51.44	0.2002	1	0.17132
ORC4	2552	5113	8	1433.27	0.2803	2	0.19454
ORC5	2553	507	2	134.38	0.265	.	0.97421
OSBP	2556	2179	3	703.2	0.3227	2	0.35851
OVGP1	2557	149	0	33.43	0.2244	1	0.08209
P2RX4	2560	557	0	193.95	0.3482	2	0.03316
P2RY1	2563	4535	13	.	.	.	0.12542
P2RY11	2566	651	0	156	0.2396	1	0.05541
PEBP1	2567	785	1	193.1	0.246	1	0.09711
PABPC1	2568	445	2	68.41	0.1537	1	.
FURIN	2569	1580	2	441.63	0.2795	.	0.47888
PCSK6	2570	1330	1	256.55	0.1929	1	0.0778
PAFAH1B2	2572	3346	4	1022.21	0.3055	2	0.05504
PAFAH1B3	2573	45	0	4.92	0.1093	1	0.2278
PRDX1	2574	294	0	75.61	0.2572	1	0.24861
PAK1	2576	1259	1	279.65	0.2221	1	0.41255
PAK2	2577	4242	14	1171.69	0.2762	.	0.34455
PALM	2579	1516	0	458.88	0.3027	2	0.15054
PARN	2582	1017	2	326.78	0.3213	2	0.165
PAWR	2583	642	4	200.59	0.3124	2	0.14271
PBX1	2585	5154	7	1240.03	0.2406	1	0.13523
PBX2	2586	1649	1	378.62	0.2296	1	0.48319
PCDH7	2589	428	0	101.15	0.2363	1	0.60781
PCNA	2592	330	1	67.37	0.2042	1	0.16517
PCOLCE	2593	72	0	17.3	0.2403	1	0.19544
CDK17	2595	1981	8	557.07	0.2812	2	0.84848
CDK18	2596	1415	1	351.76	0.2486	1	0.1042
PDCD2	2598	1987	3	523.52	0.2635	1	0.00915
PDE6D	2601	527	1	107.25	0.2035	1	0.57813
PDE7A	2603	4956	10	937.47	0.1892	1	.
PDE8A	2605	1239	4	297.93	0.2405	1	0.40773
PDE9A	2606	216	0	47.95	0.222	1	0.31129
PDK1	2610	3165	11	700.46	0.2213	1	0.09024
PDK2	2611	1272	1	256.78	0.2019	1	0.19958
PDPK1	2613	5423	10	1174.44	0.2166	1	0.20408
SERPINF1	2615	128	0	26.32	0.2056	1	0.29011
PER1	2616	598	1	205.34	0.3434	2	0.48276
PEX10	2617	964	2	239.66	0.2486	1	0.01489
PEX13	2618	3220	17	668.55	0.2076	1	0.14283
PFDN1	2622	924	0	156.8	0.1697	1	0.05847
PFDN4	2623	803	8	174.91	0.2178	1	0.31848
PFDN5	2624	105	0	34.06	0.3244	2	0.23117
PFKL	2626	519	0	60.97	0.1175	1	0.01607
PFKP	2627	226	0	19.21	0.085	1	0.04453
PFN2	2628	1263	6	274.34	0.2172	1	0.89553
PGAM1	2629	920	1	224.66	0.2442	1	0.29218
PGD	2631	762	1	216.03	0.2835	2	0.0376
PGF	2632	876	2	193.4	0.2208	1	0.25104
PGM1	2633	570	1	134.27	0.2356	1	0.18416
PHB	2634	944	0	186.18	0.1972	1	0.3055
SLC25A3	2635	472	3	147.64	0.3128	2	0.0896
PHF1	2636	579	1	117.69	0.2033	1	0.79993
PHKA1	2637	2188	4	564.23	0.2579	1	0.09124
PIGA	2641	2055	11	722.18	0.3514	2	0.28142
PIGC	2642	272	0	.	.	.	0.2424
PIGF	2643	204	2	43.04	0.211	1	.
PIK3C2A	2645	3163	5	641.97	0.203	1	0.38491
PIK3C2B	2646	2222	2	594.89	0.2677	.	0.23126
PIK3C3	2647	347	1	107.97	0.3112	2	0.05947
PIM1	2648	1337	5	269.69	0.2017	1	0.64803
PI4KB	2651	1055	0	248.98	0.236	1	0.37927
PITX1	2653	1045	0	225.1	0.2154	1	0.31508
PKM	2654	621	0	206.28	0.3322	2	0.2535
PLAG1	2655	5334	12	1232.73	0.2311	1	0.62663
PLAGL2	2657	3948	5	1085.6	0.275	.	0.56801
PLAUR	2659	319	0	61.98	0.1943	1	0.10233
PLCG1	2660	1208	1	248.12	0.2054	1	0.15549
PLCG2	2661	4695	12	1194.96	0.2545	1	0.0343
PLD2	2663	568	0	128.17	0.2257	1	0.11332
PLP2	2668	426	0	107.91	0.2533	1	.
PLRG1	2669	1688	2	377.01	0.2233	1	0.1327
PLS1	2670	1657	9	471.79	0.2847	2	0.26695
PML	2675	196	0	41.62	0.2123	1	0.02649
PMM1	2676	432	0	117.67	0.2724	.	0.0833
EXOSC10	2685	105	0	22.4	0.2133	1	0.36787
PNN	2687	1355	1	267.11	0.1971	1	0.75155
POLA2	2689	1416	2	319.74	0.2258	1	0.05025
POLB	2690	156	1	30.46	0.1953	1	0.41054
POLD1	2691	71	0	24.49	0.3449	2	0.18729
POLE2	2692	100	0	17.14	0.1714	1	0.27799
POLG	2693	446	1	94.3	0.2114	1	0.32091
POLR2E	2695	2156	0	582	0.2699	.	0.02483
POLR2G	2696	208	0	52.52	0.2525	1	0.0413
POU2F1	2697	****	22	.	.	.	0.37369
PPAT	2703	1990	6	477.86	0.2401	1	0.12263
PPM1B	2706	755	4	243.77	0.3229	2	0.95047
PPP1CA	2708	354	0	117.01	0.3305	2	0.4995
PPP1CB	2709	3637	11	860.26	0.2365	1	0.46885
PPP1CC	2710	1268	3	298.37	0.2353	1	0.85944
PPP1R7	2712	827	0	177.64	0.2148	1	0.05262
PPP1R8	2713	1226	3	268.5	0.219	1	.
PPP1R10	2714	1149	1	215.59	0.1876	1	0.5163
PPP2CA	2715	1315	6	372.14	0.283	2	0.27631
PPP2R1B	2716	3715	4	1055.75	0.2842	2	0.58878
PPP2R2A	2717	2267	9	556.7	0.2456	1	0.6999
PPP2R5C	2719	2720	4	463.96	0.1706	1	0.40465
PPP4C	2720	315	0	73.44	0.2331	1	0.64335
PPP6C	2721	3100	8	878.74	0.2835	2	0.85429
PREP	2726	577	1	145.05	0.2514	1	0.39407
HHEX	2729	883	2	203.16	0.2301	1	0.27514
PRKACA	2730	1424	2	397.01	0.2788	.	0.27982
PRKACB	2731	3193	12	855.72	0.268	.	0.53348
PRKAG1	2733	627	2	133.27	0.2126	1	0.24104
PRKAR1A	2734	2982	17	725.08	0.2432	1	.
PRKAR1B	2735	1233	0	312.29	0.2533	1	0.031
PRKAR2B	2736	2229	10	564.82	0.2534	1	0.35132
PRKCA	2737	6707	7	2129.45	0.3175	2	0.13398
PRKCI	2740	2855	11	757.28	0.2652	.	0.21107
PKN1	2741	83	0	20.46	0.2465	1	0.37509
PRKD1	2742	759	2	198.68	0.2618	1	0.72552
PRKCSH	2743	339	0	49.75	0.1468	1	.
PRKCZ	2744	386	0	85.2	0.2207	1	0.2901
EIF2AK2	2759	2135	4	363.8	0.1704	1	0.07718
PRPS1	2764	994	2	313.99	0.3159	2	0.06465
PRPS2	2765	1431	7	367.37	0.2567	1	0.07405
PRPSAP1	2766	755	1	237.08	0.314	2	0.04841
PRPSAP2	2767	589	1	151.83	0.2578	1	0.38038
CHMP1A	2768	1635	1	416.91	0.255	1	0.03993
HTRA1	2775	549	0	182.68	0.3328	2	0.41614
PSAP	2778	1158	1	379.55	0.3278	2	0.09243
PSMA1	2786	316	0	54.39	0.1721	1	0.55652
PSMA2	2787	713	0	113.88	0.1597	1	0.21118
PSMA3	2788	114	2	28.28	0.2481	1	0.50688
PSMA4	2789	318	0	66.64	0.2096	1	0.03784
PSMA5	2790	2982	5	739.93	0.2481	1	0.1536
PSMA6	2791	173	0	32.36	0.1871	1	0.12677
PSMA7	2792	130	1	43.15	0.3319	2	0.26355
PSMB1	2793	104	0	35.27	0.3391	2	0.01469
PSMB2	2794	3726	1	781.79	0.2098	1	0.06792
PSMB3	2795	64	0	5	0.0781	1	0.31697
PSMB4	2796	107	0	23.58	0.2204	1	0.61665
PSMB5	2797	238	1	56.12	0.2358	1	0.33586
PSMB6	2798	81	1	26.94	0.3326	2	0.5734
PSMB7	2799	133	0	48.84	0.3672	2	0.15327
PSMB10	2801	56	0	9.42	0.1682	1	0.07454
PSMC1	2802	215	0	77.37	0.3599	2	0.05692
PSMC2	2803	1341	2	401.13	0.2991	2	0.09303
PSMC3	2804	66	0	23.78	0.3603	2	0.14109
PSMC5	2805	58	0	11.11	0.1916	1	0.29195
PSMC6	2806	381	1	56.68	0.1488	1	0.48793
PSMD1	2807	302	0	66.04	0.2187	1	0.09202
PSMD2	2808	164	0	41.99	0.256	1	0.42006
PSMD3	2809	379	0	79.56	0.2099	1	0.39722
PSMD4	2810	136	0	26.5	0.1949	1	0.2196
PSMD7	2811	555	1	112.38	0.2025	1	0.41512
PSMD8	2812	434	1	117.13	0.2699	.	0.07928
PSMD9	2813	1554	1	294.71	0.1896	1	0.04645
PSMD10	2814	769	3	241.17	0.3136	2	0.23439
PSMD11	2815	2567	3	755.99	0.2945	2	0.52097
PSMD12	2816	2927	8	647.36	0.2212	1	0.17389
PSMD13	2817	384	0	127.77	0.3327	2	0.02029
PSME2	2818	44	0	7.12	0.1618	1	0.72371
PTBP1	2819	1501	2	258.83	0.1724	1	0.33931
PTK7	2821	839	0	214.42	0.2556	1	0.46721
TWF1	2822	1862	9	468.68	0.2517	1	0.42587
PTMA	2823	690	1	108	0.1565	1	.
PTMS	2824	510	1	90.09	0.1766	1	0.52895
QSOX1	2826	997	0	437.22	0.4385	2	0.08948
PTPN1	2827	2047	6	463.11	0.2262	1	0.29984
PTPN2	2828	1976	7	663.5	0.3358	2	0.94465
PTPN3	2829	3862	12	991.7	0.2568	1	0.11113
PTPN4	2830	7829	37	.	.	.	0.33009
PTPN9	2833	1648	4	388.74	0.2359	1	0.49847
PTPN11	2834	4126	7	1099.55	0.2665	.	0.2227
PTPN12	2835	791	1	263.59	0.3332	2	0.96758
PTPRA	2836	536	0	110.73	0.2066	1	0.73923
PTPRF	2840	1669	0	442.63	0.2652	.	0.54525
PTPRG	2841	1591	5	340.75	0.2142	1	0.6732
PTPRK	2844	1448	5	449.17	0.3102	2	0.78326
PTPRS	2850	1266	0	279.44	0.2207	1	0.26838
RAD1	2853	3505	14	688.43	0.1964	1	0.05427
NECTIN1	2855	3755	0	857.88	0.2285	1	.
NECTIN2	2856	321	0	121.76	0.3793	2	.
PEX19	2857	2742	2	613.95	0.2239	1	0.13601
ABCD3	2858	1534	4	358.72	0.2338	1	0.43115
PXN	2859	1875	1	461.65	0.2462	1	0.28413
ALDH18A1	2860	833	2	267.33	0.3209	2	0.1621
PCYT2	2861	1932	0	432.65	0.2239	1	0.09962
PYGB	2862	1490	0	380.15	0.2551	1	0.03289
PYGL	2863	175	0	33.67	0.1924	1	.
RAB2A	2865	2875	8	730.87	0.2542	1	0.50282
RAB3A	2866	669	4	197.66	0.2955	2	0.21493
RAB3B	2867	****	12	.	.	.	0.11274
RAB5B	2868	4471	8	1458.18	0.3261	2	0.36117
RAB6A	2869	2260	9	660.7	0.2923	2	0.65867
RAB13	2870	482	1	128.59	0.2668	.	0.1026
RABIF	2871	2696	5	754.69	0.2799	.	0.03552
RAD17	2873	509	4	112.61	0.2212	1	0.33711
RAD23B	2874	2538	7	505.9	0.1993	1	0.60173
RAD51	2875	980	0	333.52	0.3403	2	0.24359
RAD51C	2876	187	0	54.9	0.2936	2	0.09379
RAD51D	2878	1161	2	399.27	0.3439	2	0.11165
RAF1	2880	913	1	251.94	0.2759	.	0.32341
RALB	2881	1450	3	329.04	0.2269	1	0.09311
RANBP1	2882	305	1	62.63	0.2053	1	0.76913
RANGAP1	2883	1826	0	479.59	0.2626	1	0.11649
RAP1A	2884	4294	12	1262.94	0.2941	2	0.26269
RAP1GAP	2885	1084	1	262.21	0.2419	1	0.22765
RAP2B	2886	7379	22	.	.	.	0.68393
RARS	2887	116	0	24.42	0.2105	1	0.30941
RASA1	2890	1043	4	256.68	0.2461	1	0.82768
ARID4A	2892	1744	8	461.1	0.2644	1	0.57088
RBBP7	2893	385	1	75.88	0.1971	1	0.78035
RBBP8	2894	246	2	69.51	0.2826	2	.
RBL1	2895	2410	4	784.38	0.3255	2	0.13981
RBM4	2896	455	1	94.63	0.208	1	0.20336
RBMS1	2897	2621	5	873.09	0.3331	2	0.7351
RBMS2	2898	7063	3	1835.73	0.2599	1	0.09346
RBP1	2899	193	0	42.37	0.2195	1	0.09119
RCN1	2901	1254	5	396.28	0.316	2	0.12346
RCN2	2902	1038	5	192.34	0.1853	1	0.55419
NELFE	2904	214	0	20.58	0.0962	1	.
RDH5	2905	197	2	26.93	0.1367	1	0.12311
RDX	2906	2428	9	733.43	0.3021	2	.
RECQL	2907	1284	2	265.81	0.207	1	0.04497
REL	2908	5636	12	1216.93	0.2159	1	0.09842
RENBP	2910	17	0	3.66	0.2153	1	.
UPF1	2911	1713	3	522.35	0.3049	2	0.30139
REV3L	2912	985	1	362.51	0.368	2	0.94902
RFC1	2913	1312	5	346.01	0.2637	1	0.21529
RFC2	2914	604	0	119	0.197	1	0.0171
RFC3	2915	1212	8	336.37	0.2775	.	0.03423
RFC4	2916	77	0	18.95	0.2461	1	.
RFNG	2917	824	0	184.91	0.2244	1	0.02412
RGS2	2923	681	2	185.52	0.2724	.	0.41482
RGS10	2925	286	0	57.2	0.2	1	0.33749
RGS16	2928	1669	4	397.46	0.2381	1	0.10562
RING1	2931	323	0	70.89	0.2195	1	0.58662
RNASEH1	2936	893	2	232.21	0.26	1	0.01322
RNF4	2938	2040	3	634.31	0.3109	2	0.20228
RNH1	2939	179	0	54.67	0.3054	2	0.03482
ABCE1	2940	1951	6	557.34	0.2857	2	0.26213
ROBO1	2941	1675	5	426.28	0.2545	1	0.75311
RPA1	2945	2379	0	585.95	0.2463	1	0.47437
RPA2	2946	639	0	130.74	0.2046	1	0.08785
RPA3	2947	437	2	92.7	0.2121	1	0.09308
RPL15	2948	1355	2	380.5	0.2808	2	0.12101
MRPL12	2949	286	0	35.91	0.1256	1	0.05776
RPN1	2950	441	0	87.3	0.198	1	0.13265
RPN2	2951	308	1	79.7	0.2588	1	0.42829
RPS2	2952	37	0	8.73	0.2359	1	0.26879
RPS6KA1	2953	828	0	212.41	0.2565	1	0.29498
RPS27A	2954	276	2	84.36	0.3057	2	.
CLIP1	2956	1441	8	363.35	0.2522	1	0.55318
RXRA	2957	3972	1	932.73	0.2348	1	.
RYK	2958	1019	2	232.01	0.2277	1	0.11391
SORT1	2959	4478	5	1182.26	0.264	1	0.28653
S100A10	2966	253	0	65.1	0.2573	1	0.38155
SAFB	2967	187	0	42.3	0.2262	1	0.47803
SALL1	2968	1137	5	369.65	0.3251	2	0.91009
SAT1	2970	367	2	88.14	0.2402	1	0.7683
SATB1	2971	3782	14	930.75	0.2461	1	0.52261
SBF1	2972	2142	0	501.85	0.2343	1	0.11861
ATXN2	2973	598	4	121.57	0.2033	1	.
SCP2	2979	913	4	247.18	0.2707	.	.
SDC1	2997	1969	0	493.63	0.2507	1	0.22194
SDC2	2998	2261	8	610.26	0.2699	.	0.62289
SDC4	2999	1976	3	562.48	0.2847	2	0.22842
SDHB	3000	159	2	28.73	0.1807	1	0.20556
SDHC	3001	2318	4	466.97	0.2015	1	0.1583
SDHD	3002	831	4	196.39	0.2363	1	0.11635
SEC14L1	3003	3078	1	897	0.2914	2	0.32952
SELENOW	3009	411	1	91.91	0.2236	1	.
SET	3011	1732	2	481.65	0.2781	.	0.73732
SRSF2	3016	2046	3	498.62	0.2437	1	0.73866
SRSF3	3017	2478	7	601.54	0.2428	1	0.56625
SGTA	3021	1226	0	357.06	0.2912	2	0.04933
SH3BGRL	3022	1320	1	390.05	0.2955	2	0.09218
SH3BP2	3023	7262	6	1576.5	0.2171	1	0.07808
ITSN1	3024	1005	1	316.29	0.3147	2	.
SH3GL1	3025	1233	0	375.72	0.3047	2	0.06441
SH3GL3	3027	456	0	135.76	0.2977	2	0.4312
SHB	3028	3923	3	956.42	0.2438	1	0.42336
SHC1	3029	1505	1	410.34	0.2727	.	0.34339
SIAH1	3031	1037	4	.	.	.	0.69434
ST6GAL1	3032	2750	3	544.63	0.198	1	0.06662
STIL	3035	997	1	227.67	0.2284	1	0.14723
SKI	3036	3448	11	979.94	0.2842	2	0.37015
SLC1A4	3038	2719	1	780.69	0.2871	2	0.05621
SLC4A2	3040	160	2	50.14	0.3134	2	.
SLC6A6	3043	4342	4	1307.5	0.3011	2	0.21922
SLC7A1	3045	5066	9	1116.87	0.2205	1	0.08162
SLC7A2	3046	5422	12	1343.67	0.2478	1	0.08209
SLC9A1	3047	1498	0	382.42	0.2553	1	0.26483
SLC16A1	3051	2044	6	619.91	0.3033	2	0.37725
SLC18A2	3054	2164	6	681.49	0.3149	2	0.23899
SLC22A5	3060	1342	2	436.62	0.3254	2	0.17007
SNAI2	3068	1130	2	274.78	0.2432	1	0.72517
SMARCA1	3069	808	5	170.19	0.2106	1	0.63278
SMARCA2	3070	885	3	174.77	0.1975	1	0.87496
HLTF	3071	2103	6	528.49	0.2513	1	0.28127
SMARCA4	3072	466	1	130.82	0.2807	2	0.71071
SMARCB1	3073	338	0	77.35	0.2288	1	0.33652
SMARCC1	3074	2321	3	727.54	0.3135	2	0.40111
SMARCC2	3075	1330	0	260.81	0.1961	1	.
SMARCD1	3076	1711	0	394.89	0.2308	1	0.40629
SMARCD3	3078	130	0	15.94	0.1226	1	.
SMARCE1	3079	1065	3	231.92	0.2178	1	0.16867
SMPD2	3080	14	0	0.58	0.0414	1	0.33291
SNAPC1	3082	1445	6	367.87	0.2546	1	0.07125
SNAPC2	3083	487	0	122.1	0.2507	1	.
SNAPC4	3086	239	0	36.98	0.1547	1	0.00742
FSCN1	3088	1182	0	430.45	0.3642	2	0.2309
SNRNP70	3089	170	1	49.64	0.292	2	0.30818
SNRPA1	3090	214	0	35.94	0.1679	1	0.24831
SNRPB	3091	294	0	74.83	0.2545	1	0.93481
SNRPB2	3092	767	2	191.68	0.2499	1	0.09473
SNRPC	3093	287	0	92.96	0.3239	2	0.48137
SNRPE	3094	1220	5	321.02	0.2631	1	0.13911
SNRPF	3095	389	3	73.37	0.1886	1	0.18524
SNRPG	3096	272	0	86.84	0.3193	2	0.21594
SNTA1	3098	550	0	108.46	0.1972	1	0.45452
SNX1	3099	6616	20	1484.18	0.2243	1	0.1017
SNX2	3100	4891	21	1578.29	0.3227	2	0.13849
SOAT1	3101	5039	11	1209.57	0.24	1	0.07552
SORD	3104	1559	1	446.32	0.2863	2	.
SOX2	3106	1122	5	.	.	.	0.8345
SOX4	3107	2660	4	.	.	.	0.3152
SP1	3109	5206	9	1392.51	0.2675	.	0.66654
SP2	3110	1133	4	262.34	0.2315	1	0.58305
SP3	3111	3482	15	901.06	0.2588	1	0.46265
SP4	3112	3553	13	1122.88	0.316	2	0.75014
SPAG1	3114	882	5	329.81	0.3739	2	0.18372
UAP1	3115	480	1	108.34	0.2257	1	0.30962
SPARC	3118	2475	2	540.88	0.2185	1	0.14284
SPG7	3119	675	0	136.67	0.2025	1	0.00503
SPR	3124	623	0	187.68	0.3013	2	0.02001
SPTAN1	3127	331	0	72.39	0.2187	1	0.26982
SPTBN1	3128	2877	7	622.69	0.2164	1	0.82809
SQLE	3129	338	3	119.7	0.3541	2	0.40801
SRI	3130	1361	5	329.4	0.242	1	0.0949
SRF	3131	2316	3	560.14	0.2419	1	0.77129
SRM	3132	273	1	55.11	0.2019	1	0.38334
SRP9	3133	1107	4	257.7	0.2328	1	0.13973
SRP14	3134	643	0	148.55	0.231	1	0.11713
SRP19	3135	855	3	166.99	0.1953	1	.
SRP54	3136	415	0	115.01	0.2771	.	0.68545
SRPK1	3137	2270	6	484.35	0.2134	1	0.45309
SRPRA	3139	997	0	234.34	0.235	1	.
TRIM21	3141	388	0	107.65	0.2774	.	0.02741
SSB	3142	308	0	93.41	0.3033	2	0.75656
SSBP1	3143	134	0	33.42	0.2494	1	0.47914
SSR1	3144	8721	17	.	.	.	0.09614
SSR2	3145	492	0	90.55	0.184	1	0.25099
SSRP1	3146	422	1	88.2	0.209	1	0.29844
STAT3	3150	2420	4	522.44	0.2159	1	0.18397
STAT6	3153	1168	1	208.38	0.1784	1	0.12677
STIM1	3156	1412	1	259.35	0.1837	1	.
NEK4	3157	997	7	226.82	0.2275	1	0.06322
RPS6KB1	3161	3638	11	1019.01	0.2801	2	0.7507
STRN	3162	****	26	.	.	.	0.21273
STX5	3164	609	0	148.19	0.2433	1	0.6419
STXBP1	3165	1958	3	578.32	0.2954	2	0.17707
SUPT4H1	3168	1071	2	224.08	0.2092	1	0.03072
SUPT5H	3169	271	0	84.85	0.3131	2	0.24047
SUPT6H	3170	1059	1	252.78	0.2387	1	0.62292
SUPV3L1	3171	63	2	7.43	0.1179	1	0.43832
SURF1	3172	108	0	23.91	0.2214	1	.
SUV39H1	3173	1446	0	277.47	0.1919	1	0.26757
SYK	3177	2960	3	706.22	0.2386	1	0.01271
SYP	3179	1475	0	341.56	0.2316	1	0.15561
ADAM17	3183	1691	7	464.43	0.2746	.	0.21452
TAF2	3184	1150	8	366.91	0.3191	2	0.21598
TAF4	3185	1370	2	375.13	0.2738	.	0.78818
TAF9	3187	200	0	.	.	.	0.69618
TAPBP	3190	2066	1	432.52	0.2094	1	0.03245
TBCC	3192	537	2	.	.	.	0.42389
TBCE	3193	206	1	41.04	0.1992	1	0.19522
TBP	3194	605	3	159.4	0.2635	1	0.50824
TCEA2	3195	167	0	27.69	0.1658	1	0.12459
ELOA	3198	2486	7	545.76	0.2195	1	.
TCF4	3199	5704	11	1527.63	0.2678	.	0.86431
TCF3	3200	2417	0	637.36	0.2637	1	0.15349
TFAM	3201	4156	15	1015.41	0.2443	1	0.13751
TCF7	3202	1926	1	426.61	0.2215	1	0.17578
GCFC2	3203	1961	6	625.91	0.3192	2	0.0271
NFE2L1	3204	1904	4	462.97	0.2432	1	0.49518
TCF12	3205	2373	8	667.93	0.2815	2	0.25706
TDG	3211	1788	7	552.45	0.309	2	0.28403
TEAD4	3213	198	0	49.15	0.2482	1	0.33428
TEAD3	3214	1447	1	439.2	0.3035	2	0.24486
TMBIM6	3217	2038	1	514.84	0.2526	1	0.27559
TERF1	3218	1615	7	421.78	0.2612	1	0.03646
TFAP2A	3220	1734	8	537.08	0.3097	2	0.81077
TFAP4	3223	869	0	179.8	0.2069	1	0.58277
ARFRP1	3224	1800	1	580.22	0.3223	2	0.10489
TFRC	3234	2658	12	638.12	0.2401	1	0.36483
TGFBR2	3242	2543	1	632.26	0.2486	1	0.26723
TGFBR3	3243	3396	3	619.93	0.1825	1	0.36921
TGIF1	3244	471	0	124.01	0.2633	1	0.92655
THOP1	3249	328	0	74.38	0.2268	1	0.02522
THRA	3250	485	0	123.49	0.2546	1	0.79633
TIAL1	3252	2200	4	689.08	0.3132	2	0.50086
TIAM1	3253	1950	5	462.31	0.2371	1	0.63139
TIMP1	3254	100	0	25.97	0.2597	1	0.08659
TIMP2	3255	2690	4	717.26	0.2666	.	0.25179
TJP1	3257	2228	4	599.87	0.2692	.	0.69955
TK1	3258	680	0	168.21	0.2474	1	0.03652
SEC62	3262	5310	14	1540.5	0.2901	2	0.20656
TSPAN6	3270	2918	6	702.09	0.2406	1	0.06777
TSPAN4	3271	486	1	128.9	0.2652	.	.
GPR137B	3272	751	1	171.35	0.2282	1	0.14005
TM7SF2	3273	182	0	37.86	0.208	1	.
TRAPPC10	3274	3021	12	802.65	0.2657	.	0.24708
TMOD1	3275	2045	6	455.26	0.2226	1	0.34107
TMPO	3276	1292	6	308.86	0.2391	1	0.46016
TNNT1	3283	217	0	43.62	0.201	1	0.03709
TOP1	3286	1190	4	378.22	0.3178	2	0.96609
TPD52L1	3287	1445	3	423.06	0.2928	2	0.18753
TPD52L2	3288	1600	0	386.53	0.2416	1	0.198
TPM2	3289	233	0	24.21	0.1039	1	.
TPM4	3290	1657	3	275.17	0.1661	1	0.32746
TPP2	3291	1642	3	389.54	0.2372	1	0.59462
TPR	3292	2319	4	617.01	0.2661	.	0.19814
TPT1	3295	3915	6	1027.23	0.2624	1	0.53591
NR2C1	3297	2000	8	471.35	0.2357	1	0.29544
NR2C2	3298	6271	12	1388.67	0.2214	1	0.17543
HSP90B1	3299	268	2	81.11	0.3026	2	.
TRAF3	3300	5716	6	1575.6	0.2756	.	0.29909
TRIP6	3302	151	0	16.64	0.1102	1	0.16817
TRPC1	3304	1653	9	526.21	0.3183	2	0.39768
TSPYL1	3309	3658	4	.	.	.	0.08631
EIPR1	3310	410	1	73.68	0.1797	1	.
TST	3312	168	0	37.4	0.2226	1	0.08468
TSTA3	3313	292	0	69.18	0.2369	1	0.08541
TTC1	3314	480	0	134.45	0.2801	2	0.18549
DNAJC7	3315	312	0	69.96	0.2242	1	0.80601
TTC3	3316	1533	2	445.93	0.2909	2	0.09084
TTK	3318	325	0	89.85	0.2765	.	0.06913
TUB	3320	4488	4	836.72	0.1864	1	0.16508
TUFM	3321	564	0	159.39	0.2826	2	0.07436
TULP3	3324	1696	4	400.84	0.2363	1	0.08818
HIRA	3325	739	1	179.28	0.2426	1	0.47202
TXN	3329	345	2	83.59	0.2423	1	0.66313
TXNRD1	3330	1886	6	492.25	0.261	1	0.1048
TYK2	3331	306	0	62.43	0.204	1	0.02229
UBA52	3333	2310	2	607.75	0.2631	1	0.0898
UBA1	3334	199	0	21.47	0.1079	1	.
UBE2A	3336	1174	5	228.73	0.1948	1	0.36881
UBE2B	3337	1755	4	464.18	0.2645	1	0.28621
UBE2D1	3338	1988	10	530.9	0.2671	.	0.58945
UBE2D2	3339	1633	4	521.05	0.3191	2	0.97041
UBE2D3	3340	3032	11	726.16	0.2395	1	0.59289
UBE2E1	3341	1034	7	308.16	0.298	2	0.86274
UBE2G1	3342	3337	9	919.09	0.2754	.	.
UBE2G2	3343	2797	6	790.53	0.2826	2	0.06873
UBE2H	3344	4205	10	1247.52	0.2967	2	0.3855
UBE2I	3345	2225	1	602.03	0.2706	.	0.23576
UBE2L3	3347	2365	5	664.09	0.2808	2	0.29598
UBE2N	3348	1727	3	468.99	0.2716	.	0.29996
UBE2V2	3350	1066	5	302	0.2833	2	0.25865
SUMO1	3352	1073	0	202.24	0.1885	1	0.75086
UCP2	3355	336	0	93.74	0.279	.	0.11364
UGCG	3358	2377	10	645.27	0.2715	.	0.70248
UGDH	3359	1387	3	341.65	0.2463	1	0.37706
UGT8	3360	1937	7	536.28	0.2769	.	0.36868
UNG	3362	1024	0	211.86	0.2069	1	0.02945
USP4	3363	1149	1	319.63	0.2782	.	0.1657
UPP1	3364	376	0	110.13	0.2929	2	0.02914
UQCRC1	3365	129	0	26.12	0.2025	1	0.23941
UQCRC2	3366	489	1	88.19	0.1803	1	0.11305
USF2	3367	565	1	148.23	0.2624	1	0.65753
USP1	3368	823	6	253.08	0.3075	2	0.73913
UVRAG	3369	2825	9	738.56	0.2614	1	0.26445
VASP	3370	806	1	219.04	0.2718	.	0.35316
VAV2	3371	2168	1	495.44	0.2285	1	0.1864
VBP1	3372	999	3	237.37	0.2376	1	0.16406
VCL	3373	1991	2	577.32	0.29	2	0.36826
VDAC1	3374	896	1	302.14	0.3372	2	0.76663
VDAC2	3375	459	3	98.14	0.2138	1	0.91475
VEGFA	3376	1925	10	512.6	0.2663	.	0.72321
VEGFB	3377	931	0	176.36	0.1894	1	0.13663
EZR	3379	1173	2	275.85	0.2352	1	0.17206
VIM	3380	322	1	77.71	0.2413	1	0.81351
VRK1	3384	406	1	129.22	0.3183	2	0.09507
WIPF1	3387	2973	8	924.01	0.3108	2	0.36016
WEE1	3390	1165	0	273.34	0.2346	1	0.30629
WNT5A	3392	4377	13	1207.11	0.2758	.	0.38226
WNT10B	3394	755	1	220.44	0.292	2	0.22926
XPO1	3400	886	4	252.93	0.2855	2	0.96713
XRCC4	3401	518	2	137.55	0.2655	.	0.26292
YY1	3403	1434	2	421.91	0.2942	2	0.35172
YWHAB	3404	2094	3	496.72	0.2372	1	0.59777
YWHAH	3405	811	3	186.58	0.2301	1	0.81747
YWHAZ	3406	2117	8	588.9	0.2782	.	0.33873
ZBTB14	3409	1839	3	492.11	0.2676	.	0.46647
ZFX	3410	4879	15	1172.71	0.2404	1	0.59128
ZIC3	3413	2030	11	528.52	0.2604	1	0.88823
ZNF267	3414	827	6	240.95	0.2914	2	0.24143
ZNF268	3415	2582	5	738.62	0.2861	2	0.15558
ZNF7	3416	54	0	2.64	0.0489	1	.
CNBP	3418	2638	3	679.79	0.2577	1	0.182
ZNF35	3420	844	1	110.3	0.1307	1	0.05229
ZNF37A	3421	4515	12	1173.67	0.2599	1	0.13915
ZNF45	3425	763	1	175.66	0.2302	1	0.06053
ZNF74	3426	1495	1	317.92	0.2127	1	0.2889
ZNF76	3427	739	1	236.53	0.3201	2	0.38544
ZNF84	3428	4372	11	1170.52	0.2677	.	0.06385
ZNF124	3431	1577	1	522.84	0.3315	2	0.2024
ZNF131	3432	1191	6	233.71	0.1962	1	0.81172
ZNF133	3434	180	0	40.78	0.2266	1	0.24775
ZNF134	3435	3314	4	851.24	0.2569	1	0.04258
ZNF136	3437	1880	5	492.78	0.2621	1	.
ZKSCAN1	3439	7492	9	2171.92	0.2899	2	0.18995
ZNF140	3440	1023	4	274.11	0.2679	.	0.09381
ZNF143	3442	911	4	227.39	0.2496	1	0.74088
ZBTB17	3443	100	1	17.33	0.1733	1	0.38457
ZNF165	3447	93	0	18.64	0.2004	1	0.07973
TRIM26	3449	1421	1	276	0.1942	1	0.14449
ZNF174	3450	445	0	54.68	0.1229	1	0.07418
ZNF189	3452	1011	2	245.58	0.2429	1	0.46286
ZMYM2	3453	5830	22	1469.57	0.2521	1	0.44007
ZNF200	3454	1567	3	491.96	0.314	2	0.15042
ZNF202	3455	2070	3	606.94	0.2932	2	0.17244
ZNF205	3456	192	0	35.11	0.1829	1	0.09153
ZNF207	3457	690	5	128.98	0.1869	1	.
SLC30A3	3459	740	0	297.45	0.402	2	0.49124
ZYX	3461	429	0	103.67	0.2417	1	0.09542
PTP4A1	3463	3414	15	951.26	0.2786	.	0.39922
CXCR4	3467	520	0	178.35	0.343	2	0.59962
FZD5	3468	4396	14	.	.	.	0.34473
USP7	3470	1904	2	540.56	0.2839	2	0.41333
DEK	3472	1550	6	501.61	0.3236	2	0.53876
STAM	3473	2044	10	474.83	0.2323	1	0.57536
RASSF7	3475	380	0	120.58	0.3173	2	0.12078
PDHX	3477	956	7	273.77	0.2864	2	0.18747
CUL5	3478	3377	23	665.49	0.1971	1	0.56704
USP5	3481	555	0	109.98	0.1982	1	0.38948
KMT2D	3482	2805	5	632.2	0.2254	1	0.95842
HMGA2	3483	2999	10	736.89	0.2457	1	0.76628
SLC7A5	3486	2954	2	870.49	0.2947	2	0.02532
TAF15	3487	297	0	97.09	0.3269	2	0.96462
AKAP1	3488	1025	2	218.35	0.213	1	0.36109
NRIP1	3489	3481	9	.	.	.	0.6866
NAA10	3491	160	1	9.9	0.0619	1	0.21058
TRRAP	3496	888	2	270.01	0.3041	2	.
SNN	3498	2833	2	.	.	.	0.17555
ACOX3	3501	679	0	136.05	0.2004	1	0.03427
AXIN1	3502	682	0	113.06	0.1658	1	0.27542
CDC7	3503	1329	4	457.44	0.3442	2	0.08002
CDC45	3504	133	2	35.24	0.265	.	0.05069
FZD6	3506	1357	7	354.49	0.2612	1	0.214
FZD7	3507	2065	5	.	.	.	0.45142
HIST1H2A	3512	65	0	.	.	.	0.36468
HYAL3	3549	418	0	103.13	0.2467	1	0.10353
PIP5K1A	3557	1666	4	407.31	0.2445	1	0.42595
PIP4K2B	3559	4000	4	1088.88	0.2722	.	0.22874
PLA2G6	3560	666	0	191.86	0.2881	2	0.07543
SLC25A11	3562	611	1	157.01	0.257	1	0.34199
SPOP	3563	1494	1	446.04	0.2986	2	0.80559
TAGLN2	3564	693	3	240.15	0.3465	2	0.38602
ULK1	3565	1801	1	410.28	0.2278	1	0.07829
EEA1	3566	3502	15	982.59	0.2806	2	0.33209
ANXA9	3568	316	0	103.68	0.3281	2	0.12946
STX7	3569	3234	14	964.17	0.2981	2	0.11614
LTBP4	3573	270	0	59.58	0.2207	1	0.1566
VAPA	3574	5810	15	1463.67	0.2519	1	0.18567
ZNF282	3575	1600	0	331.98	0.2075	1	.
STK24	3576	2974	2	778.98	0.2619	1	0.23007
RAD54L	3579	191	1	21.34	0.1117	1	0.61699
NSMAF	3580	602	1	156.87	0.2606	1	.
NCK2	3581	1098	3	258.38	0.2353	1	0.5111
DYRK3	3582	232	0	58.88	0.2538	1	0.06272
DYRK2	3583	3951	18	.	.	.	0.4429
DUSP11	3584	463	1	107.15	0.2314	1	0.1019
DOC2A	3586	672	0	136.25	0.2028	1	0.51099
DHX16	3587	123	1	33.84	0.2751	.	0.48024
CUL4B	3588	2172	7	567.05	0.2611	1	0.45893
CUL4A	3589	1496	5	427.3	0.2856	2	0.37394
CUL3	3590	4095	20	1214.32	0.2965	2	0.38811
CUL2	3591	1760	3	435.11	0.2472	1	0.30756
CUL1	3592	528	4	146.62	0.2777	.	0.69482
TTF2	3594	1346	7	365.04	0.2712	.	0.02341
TPST2	3595	527	2	104.06	0.1975	1	0.11183
TPST1	3596	586	2	154	0.2628	1	0.10396
KLF11	3597	2329	6	590.36	0.2535	1	0.15773
TEAD2	3598	729	1	181.61	0.2491	1	0.28927
SUPT3H	3599	3086	18	936.62	0.3035	2	0.31958
AURKA	3600	769	1	193.82	0.252	1	0.13045
SMARCA5	3601	4305	13	982.16	0.2281	1	0.80924
IRS4	3604	74	0	.	.	.	0.11048
CDC42BPA	3607	4403	8	1429.87	0.3247	2	0.17763
HIRIP3	3609	886	0	206.93	0.2336	1	0.1593
RAE1	3610	364	0	70.88	0.1947	1	0.05625
OFD1	3611	253	1	75.33	0.2977	2	0.03911
SLC4A7	3615	4043	20	982.85	0.2431	1	0.43777
GEMIN2	3616	494	1	78.38	0.1587	1	0.16229
PRSS12	3619	1898	3	460.66	0.2427	1	0.03006
PPM1D	3620	2728	5	709.42	0.2601	1	0.27342
PPFIBP1	3622	2682	5	624.11	0.2327	1	0.12892
RANBP3	3624	1471	1	409.44	0.2783	.	0.23433
PPFIA1	3626	1511	8	303.77	0.201	1	0.29109
SLC43A1	3627	565	1	130.53	0.231	1	0.26422
PKP4	3628	752	1	199.46	0.2652	.	0.89325
PIK3R3	3629	3533	5	824.05	0.2332	1	0.43884
PEX3	3630	1390	6	404.78	0.2912	2	0.28086
PARG	3631	1065	1	319.55	0.3	2	0.17858
NIPSNAP1	3634	1127	3	347.22	0.3081	2	0.11298
NDST2	3635	540	0	135.63	0.2512	1	0.43704
ITGA8	3638	3209	17	1059.42	0.3301	2	0.18722
ELP1	3640	1595	3	463.52	0.2906	2	.
IFITM1	3641	159	0	18.39	0.1157	1	0.0303
HAT1	3642	334	1	75.43	0.2258	1	0.26885
SLC27A2	3645	296	1	43.44	0.1468	1	0.3607
DGKZ	3646	607	0	147.24	0.2426	1	0.33865
DGKE	3647	5884	28	1459.87	0.2481	1	0.09177
DGKD	3648	2637	2	509.37	0.1932	1	0.05865
YBX3	3651	612	1	210.79	0.3444	2	0.24628
COPS3	3653	474	3	119.86	0.2529	1	0.09471
CBX4	3655	803	3	219.74	0.2736	.	0.60399
CAMK1	3656	194	0	31.01	0.1598	1	0.41451
BARX2	3658	877	2	229.34	0.2615	1	0.27087
AGPS	3659	5641	20	1430.69	0.2536	1	0.44209
PPFIA3	3660	808	1	161.67	0.2001	1	.
PIR	3662	205	1	61.23	0.2987	2	0.05975
CGGBP1	3663	3523	6	.	.	.	0.4827
AP3B1	3664	576	2	133.65	0.232	1	0.17524
BLZF1	3666	678	2	167.42	0.2469	1	0.13907
BHLHE40	3670	1489	0	343.63	0.2308	1	0.43031
CDC14B	3671	3640	6	830.61	0.2282	1	0.09763
PRPF18	3675	528	2	152.84	0.2895	2	0.1571
DEGS1	3676	963	2	190.01	0.1973	1	0.08462
DENR	3677	1986	6	581.75	0.2929	2	0.21639
THOC5	3678	290	0	83.6	0.2883	2	0.13967
YARS	3680	742	3	121.82	0.1642	1	0.28903
PDXK	3681	6244	3	1903.17	0.3048	2	0.01731
RRP1	3683	328	0	49	0.1494	1	0.00117
KHSRP	3685	1008	1	273.02	0.2709	.	0.56647
EXO1	3686	466	1	82.2	0.1764	1	0.13773
CASK	3688	5486	9	1348.7	0.2458	1	0.41358
AKR7A2	3689	1517	1	298.12	0.1965	1	0.02843
PRKRA	3690	683	5	149.03	0.2182	1	0.43989
TMEFF1	3692	1036	8	268.94	0.2596	1	0.8708
NOP14	3703	272	1	71.37	0.2624	1	0.02599
FAM193A	3704	707	0	168.71	0.2386	1	0.16498
SLC25A12	3705	1869	5	585.98	0.3135	2	0.24837
RUVBL1	3707	293	0	43.59	0.1488	1	0.07252
KLF7	3709	7076	20	1694.95	0.2395	1	0.8241
PLPP1	3711	364	1	82.75	0.2273	1	.
PLPP3	3713	1804	2	479.16	0.2656	.	.
STC2	3714	3124	11	693.7	0.2221	1	0.17484
USO1	3715	994	7	271.92	0.2736	.	0.35619
CDK13	3718	2154	8	501.52	0.2328	1	0.5755
PSMG1	3720	144	0	44.46	0.3088	2	0.05513
RFXANK	3721	150	0	30.14	0.2009	1	0.38333
JRK	3724	6895	0	1905.33	0.2763	.	0.04409
HSD17B6	3725	448	3	128.12	0.286	2	0.04108
RTCA	3729	1265	3	316.41	0.2501	1	0.04546
RNASET2	3730	72	0	12.46	0.1731	1	0.06518
SSNA1	3731	456	0	56.96	0.1249	1	0.05074
KCNK5	3740	1919	1	580.08	0.3023	2	0.09476
NCOA1	3743	2311	8	535.84	0.2319	1	0.85869
NUMB	3744	1368	4	395.42	0.289	2	0.55369
DYNLL1	3746	285	1	80.67	0.2831	2	0.94377
TNKS	3747	5610	11	1248.57	0.2226	1	0.18031
ALDH4A1	3748	1415	0	252.76	0.1786	1	0.03656
EIF3A	3750	1010	6	184.31	0.1825	1	0.8919
EIF3B	3751	481	1	118.42	0.2462	1	0.09848
EIF3C	3752	217	0	31.12	0.1434	1	.
EIF3D	3753	137	1	12.95	0.0945	1	0.0809
EIF3F	3754	149	0	24.99	0.1677	1	0.05713
EIF3G	3755	100	0	30.47	0.3047	2	0.15903
EIF3H	3756	190	0	48.15	0.2534	1	0.10835
EIF3I	3757	408	0	79.73	0.1954	1	0.17311
EIF3J	3758	1654	8	441.18	0.2667	.	0.7001
EIF4G3	3760	1027	7	198.1	0.1929	1	0.94392
VAMP8	3761	317	0	81.2	0.2562	1	0.26686
VAMP4	3762	4350	15	1115.56	0.2565	1	0.18025
STX16	3763	3235	17	907.6	0.2806	2	0.24523
STX10	3765	352	0	103.08	0.2928	2	0.20681
BECN1	3766	628	3	201.65	0.3211	2	0.57046
PEA15	3768	1890	1	426.26	0.2255	1	0.42188
SRSF9	3769	351	1	100.26	0.2856	2	0.87873
JRKL	3772	1339	7	.	.	.	0.1932
HYAL2	3773	339	0	120.46	0.3553	2	0.34872
GALNT4	3774	3401	18	.	.	.	0.09699
B4GALT4	3778	807	3	240.82	0.2984	2	0.19328
B4GALT3	3779	506	2	173.7	0.3433	2	0.71474
B4GALT2	3780	723	0	222.16	0.3073	2	0.66891
EDF1	3792	170	0	14.43	0.0849	1	0.46155
CTSF	3793	469	1	86.47	0.1844	1	.
SNX4	3794	1135	4	296.33	0.2611	1	0.49237
SNX3	3795	932	5	226.07	0.2426	1	0.69643
URI1	3796	1543	6	370.44	0.2401	1	0.44116
EED	3797	285	2	100.94	0.3542	2	.
CTNNAL1	3798	200	0	47.91	0.2396	1	0.54592
RNMT	3799	4577	10	874.47	0.1911	1	0.06015
RNGTT	3800	2822	13	892.21	0.3162	2	0.42907
GPAA1	3801	91	0	11.54	0.1268	1	0.1469
RIPK1	3804	1848	3	501.82	0.2715	.	0.01446
CRADD	3805	485	1	140.89	0.2905	2	0.04061
HRK	3806	1103	1	281.11	0.2549	1	0.07374
ADAM23	3812	3503	0	1014.19	0.2895	2	0.43432
ADAM15	3815	274	0	31.39	0.1146	1	0.16642
ADAM9	3816	1561	7	412.72	0.2644	1	0.42153
CDS2	3818	7653	8	.	.	.	0.06063
PABPC4	3819	323	1	110.92	0.3434	2	0.35359
RIPK2	3821	648	3	154.31	0.2381	1	0.0669
FADD	3824	929	0	357.96	0.3853	2	0.0172
SNAP23	3825	1583	6	352.89	0.2229	1	0.31783
NAPG	3826	2549	12	723.15	0.2837	2	0.07254
NAPA	3827	654	2	130.99	0.2003	1	0.07853
RIOK3	3831	1858	8	431.2	0.2321	1	0.2074
FPGT	3838	2870	8	688.65	0.2399	1	0.12307
TNFRSF10	3840	2282	4	754.6	0.3307	2	0.01852
TNFRSF10	3842	2538	5	729.38	0.2874	2	0.02933
DYRK4	3845	135	0	38.41	0.2845	2	.
PEX11B	3846	813	3	239.85	0.295	2	0.1475
PEX11A	3847	1846	8	424.72	0.2301	1	0.03491
SUCLG2	3848	1027	4	265.48	0.2585	1	.
SUCLG1	3849	223	0	78.31	0.3512	2	0.16403
SUCLA2	3850	715	4	142.36	0.1991	1	0.58198
CREG1	3851	1285	5	307.85	0.2396	1	0.03585
TRIM24	3852	637	1	147.17	0.231	1	0.10929
DPM1	3859	277	1	36.32	0.1311	1	0.27659
BANF1	3860	374	0	65.36	0.1748	1	0.29222
DCAF5	3861	2937	6	842.34	0.2868	2	0.31579
DPM2	3863	627	0	164.36	0.2621	1	0.06326
SAP30	3864	205	0	61.4	0.2995	2	0.1196
CES2	3869	1071	2	200.68	0.1874	1	0.01623
IQGAP1	3870	2135	9	663.25	0.3107	2	0.15698
NRP1	3873	2585	4	587.23	0.2272	1	0.66008
GMPS	3875	40	0	9.81	0.2453	1	0.06585
TMEM11	3876	374	0	43.7	0.1168	1	0.57238
SOCS2	3877	1566	5	347.99	0.2222	1	0.54943
GGH	3878	253	2	53.26	0.2105	1	0.0386
CFLAR	3879	8715	19	.	.	.	0.15262
HDAC3	3883	592	0	168.45	0.2845	2	0.22224
KAT2B	3884	1879	6	616.18	0.3279	2	0.61956
CDK5R1	3885	2709	8	.	.	.	0.41807
ASAP2	3887	2356	8	699.77	0.297	2	0.3585
ALDH1A2	3888	1773	8	419.28	0.2365	1	0.26959
LDB1	3893	533	0	104.06	0.1952	1	0.46137
SYNJ1	3895	2236	5	633.46	0.2833	2	0.2573
ST3GAL5	3896	996	4	268.32	0.2694	.	0.08623
IER3	3897	737	6	209.88	0.2848	2	0.22893
SYNJ2	3898	2812	5	865.91	0.3079	2	0.03912
ARHGEF7	3899	2621	3	748.28	0.2855	2	0.09224
SQSTM1	3900	1485	3	313.66	0.2112	1	0.07286
SGPL1	3901	3854	3	1222.52	0.3172	2	0.12062
FUBP1	3902	364	1	104.94	0.2883	2	0.7899
CDC16	3903	198	0	33.96	0.1715	1	0.14171
ZPR1	3904	736	2	247.01	0.3356	2	0.04352
NAE1	3905	131	0	20.33	0.1552	1	0.33395
EIF2B5	3907	368	0	80.04	0.2175	1	0.15352
EIF2S2	3908	1432	1	243.21	0.1698	1	0.15227
CPNE3	3909	3088	12	745.36	0.2414	1	0.0501
BUD31	3910	175	0	57.37	0.3278	2	0.14233
PRPF4B	3913	4367	19	991.31	0.227	1	0.53096
CPNE1	3915	210	0	40.99	0.1952	1	0.16534
AP1S2	3916	1519	5	446.42	0.2939	2	0.34115
AP1G2	3917	186	0	49.58	0.2666	.	.
GYG2	3918	1607	4	349.98	0.2178	1	0.00974
SGCE	3919	275	1	82.84	0.3012	2	0.79019
TIMELESS	3920	1343	2	371.43	0.2766	.	0.04832
BCL10	3921	1851	4	471.69	0.2548	1	0.09431
HERC1	3922	463	2	94.1	0.2032	1	0.84287
RAB29	3929	2356	3	783.82	0.3327	2	0.06379
SKAP2	3930	2604	7	681	0.2615	1	0.23788
WASF1	3931	703	3	115.71	0.1646	1	0.88975
ST13	3932	2003	9	505.06	0.2522	1	0.22567
FUBP3	3934	1330	4	408.82	0.3074	2	0.85771
TOP3B	3935	89	0	9.73	0.1093	1	.
AP3D1	3938	1185	2	280.39	0.2366	1	0.15595
BTRC	3939	4198	5	1133.27	0.27	.	0.23075
USP13	3940	5260	15	1307.58	0.2486	1	0.1577
WASL	3941	2592	13	700.28	0.2702	.	0.59659
RPS6KA4	3942	735	0	156.44	0.2128	1	0.39879
STBD1	3943	1130	2	186.02	0.1646	1	0.07396
SELENBP1	3944	241	1	82.43	0.342	2	0.08499
ATP6V0E1	3945	535	0	88.81	0.166	1	0.19826
RPS6KB2	3952	239	0	85.53	0.3579	2	.
BRSK2	3957	1700	2	352.74	0.2075	1	0.24754
RNF8	3958	3980	3	1000.37	0.2513	1	0.17047
HIP1R	3959	1207	1	280.46	0.2324	1	0.04535
UBA3	3968	707	4	228.62	0.3234	2	0.44654
UBE2M	3969	377	1	52.43	0.1391	1	0.80587
SPAG9	3971	4098	12	859.78	0.2098	1	0.33064
BTAF1	3972	1392	9	338.01	0.2428	1	0.59419
RPL14	3973	140	2	20.97	0.1498	1	0.02749
SH2D2A	3975	334	0	62.41	0.1869	1	0.38316
AIP	3977	115	1	15.18	0.132	1	.
PRC1	3981	1093	1	251.67	0.2303	1	0.15132
SLC7A6	3983	4495	8	1030.01	0.2291	1	0.17889
CLK3	3992	318	1	50.98	0.1603	1	0.69811
CLK2	3993	350	0	66.54	0.1901	1	0.57839
NFKB1	3998	708	3	162.07	0.2289	1	0.33903
ACOX1	4035	5241	9	1158.15	0.221	1	0.05265
ADCY3	4036	763	4	95.07	0.1246	1	0.4796
AMPD2	4037	903	1	228.68	0.2532	1	0.18161
ANXA2	4039	479	0	133.35	0.2784	.	0.27278
RHOB	4040	1389	4	.	.	.	0.5378
ARRB1	4041	6041	5	1545.04	0.2558	1	0.09457
ATIC	4044	118	0	20.79	0.1762	1	0.0733
ATOX1	4045	184	0	60.69	0.3298	2	0.05169
ATP5F1A	4046	138	0	21.57	0.1563	1	.
ATP6V0B	4047	293	1	86.7	0.2959	2	0.1925
B2M	4048	567	3	131.35	0.2317	1	0.0822
BCL2L2	4050	2794	5	708.55	0.2536	1	0.63024
BNIP3	4052	841	4	250.42	0.2978	2	0.07013
BYSL	4053	340	1	77.34	0.2275	1	.
CA8	4056	4601	9	1263.94	0.2747	.	0.07868
KYAT1	4059	471	0	107.58	0.2284	1	.
CCNG1	4060	1346	3	279.74	0.2078	1	0.09369
CDKN1B	4064	1356	7	305.14	0.225	1	0.33434
CDR1	4065	318	2	.	.	.	0.42201
AP2M1	4068	475	0	89.85	0.1892	1	0.58682
AP2S1	4069	289	0	48.29	0.1671	1	0.23678
CLK1	4071	297	1	83.63	0.2816	2	0.44992
COX8A	4074	223	1	72.25	0.324	2	0.41878
CRY1	4075	638	2	220.27	0.3453	2	0.71205
CS	4077	1385	1	270.8	0.1955	1	0.32732
DCTN1	4082	345	0	69.85	0.2025	1	0.42843
DDIT3	4083	221	2	27.66	0.1252	1	0.29505
TIMM8A	4085	843	3	192.56	0.2284	1	0.07644
COCH	4086	825	5	256.99	0.3115	2	.
DLG1	4087	2063	9	739.41	0.3584	2	0.5534
TSC22D3	4089	1298	1	364.82	0.2811	2	0.74602
DUSP3	4090	3488	6	969.84	0.2781	.	0.11351
E2F2	4091	3452	2	1058.01	0.3065	2	0.12402
ECHS1	4092	385	0	54.95	0.1427	1	0.01683
EFNB2	4093	3309	7	803.6	0.2429	1	0.63649
EIF2S1	4094	3076	11	701.75	0.2281	1	0.18136
EIF4EBP1	4095	430	0	98.99	0.2302	1	0.27062
EIF4EBP2	4096	6871	14	2082.96	0.3032	2	0.13419
STOM	4099	2214	3	479.16	0.2164	1	0.12238
EYA4	4100	3315	9	811.18	0.2447	1	0.4306
FABP3	4102	633	1	170.34	0.2691	.	0.21868
FASN	4104	805	2	146.08	0.1815	1	0.07677
FCGRT	4107	309	0	61.67	0.1996	1	0.43845
FDX1	4109	2416	9	638.45	0.2643	1	0.06771
FDXR	4110	320	0	47.83	0.1495	1	0.04642
FEN1	4111	740	0	.	.	.	0.1157
FGF11	4112	1786	1	329.37	0.1844	1	0.3464
FKBP1B	4116	489	0	64.67	0.1322	1	0.78855
FKBP5	4117	2250	6	666.66	0.2963	2	0.09521
GMFB	4124	3597	14	1050.17	0.292	2	0.53079
GNG11	4126	298	0	78.27	0.2627	1	0.22585
GPS1	4127	343	0	46.59	0.1358	1	.
GTF2F2	4128	544	2	103.33	0.1899	1	.
GYG1	4130	736	1	189.04	0.2568	1	0.26476
HSPA9	4134	1155	6	373.68	0.3235	2	0.11558
IDH3G	4135	106	0	17.73	0.1673	1	0.0007
IREB2	4136	3313	7	820.56	0.2477	1	0.18756
LLGL1	4140	969	1	273	0.2817	2	0.11992
CITED1	4143	85	0	18.88	0.2221	1	0.689
NDUFB7	4146	55	0	10.34	0.188	1	.
DRG1	4147	215	0	22.75	0.1058	1	0.05826
NINJ1	4148	751	0	155.95	0.2077	1	0.0312
OAZ1	4152	380	1	128.98	0.3394	2	0.46703
ORC1	4153	352	0	97.15	0.276	.	0.0665
PRKAR2A	4157	5006	11	1157.56	0.2312	1	0.29934
RAB1A	4161	1639	5	383.71	0.2341	1	0.71114
RAB5A	4162	1352	7	506.83	0.3749	2	0.72359
SDHA	4168	662	1	172.91	0.2612	1	.
SHMT1	4169	890	2	204.49	0.2298	1	0.20304
SLC1A1	4170	1911	5	457.27	0.2393	1	0.27342
SLC1A3	4172	2065	3	482.23	0.2335	1	0.2693
SNRPD3	4175	2987	2	602.98	0.2019	1	.
SREBF1	4176	1273	1	313.4	0.2462	1	0.19064
STX3	4177	5058	5	1539.54	0.3044	2	.
TARBP2	4178	283	0	47.87	0.1692	1	0.3484
TANK	4180	653	6	205.58	0.3148	2	0.30294
UCHL1	4181	356	0	123.22	0.3461	2	0.19054
UXT	4182	50	0	0.3	0.006	1	0.46674
WARS	4184	1087	0	245.79	0.2261	1	0.04391
SEMA3F	4186	960	3	262.5	0.2734	.	0.48238
KDM5C	4187	1646	0	384.43	0.2336	1	0.67178
GBF1	4193	563	0	190.57	0.3385	2	0.4393
ADAM22	4194	85	0	23.92	0.2814	2	0.22618
CDKL1	4196	483	2	184.93	0.3829	2	0.08755
STK19	4197	397	0	106.57	0.2684	.	.
P4HA2	4199	400	0	105.42	0.2636	1	0.13824
PKMYT1	4203	162	0	25.49	0.1573	1	0.45663
PIGQ	4204	1101	0	291.86	0.2651	.	0.09229
USP2	4205	1620	2	302.51	0.1867	1	0.47362
SEC22C	4206	649	5	159.47	0.2457	1	0.07163
AIFM1	4208	195	0	20.33	0.1043	1	.
FIBP	4214	234	0	50.73	0.2168	1	0.06881
EBAG9	4215	1437	5	395.66	0.2753	.	0.54154
AURKB	4217	140	0	18.54	0.1324	1	0.30313
RAB11B	4218	876	1	183.54	0.2095	1	0.34
PTTG1	4219	63	0	7.11	0.1129	1	0.50205
ZNF213	4220	1457	0	381.78	0.262	1	0.12349
GPR50	4224	28	0	3.5	0.125	1	.
STK17B	4226	3864	11	1017.57	0.2633	1	0.09498
CYTH3	4227	3165	2	594.92	0.188	1	0.25663
CYTH2	4228	3104	3	806.22	0.2597	1	0.08928
ATP6V1F	4231	271	0	46.9	0.1731	1	0.19765
SOCS6	4232	3922	16	.	.	.	0.39194
CD83	4233	1682	4	466.09	0.2771	.	0.14052
COPS2	4236	2676	10	733.93	0.2743	.	0.6092
TRIP13	4237	946	3	346.48	0.3663	2	0.01275
TRIP12	4238	3717	14	1024.57	0.2756	.	0.39809
TRIP11	4239	3682	18	774.29	0.2103	1	0.16011
TRIP10	4240	315	0	68.37	0.217	1	.
HMGN3	4242	443	2	94.78	0.214	1	0.75516
EFTUD2	4247	987	2	197.68	0.2003	1	0.19257
RAB28	4249	933	1	276.19	0.296	2	0.28556
RAB9A	4251	473	3	.	.	.	0.41581
SLC9A3R1	4252	704	0	202.36	0.2874	2	.
COX5A	4255	177	1	38.09	0.2152	1	0.09649
TGFBRAP1	4257	2993	1	796.35	0.2661	.	0.05837
RECQL5	4259	577	0	160.11	0.2775	.	0.04723
RECQL4	4260	147	0	25.16	0.1712	1	.
SELENOF	4261	1029	6	282.54	0.2746	.	.
SEMA4F	4263	3645	1	646.23	0.1773	1	0.30376
FADS2	4265	1665	0	309.46	0.1859	1	0.03782
HOMER1	4272	2185	15	512.93	0.2348	1	0.77675
CHST3	4273	5093	6	1203.79	0.2364	1	0.09926
SLC25A27	4277	1736	4	424.04	0.2443	1	0.18121
PIGL	4278	361	2	51.08	0.1415	1	0.043
PMPCB	4279	2415	8	509.27	0.2109	1	0.32386
EEF1E1	4280	495	4	93.38	0.1886	1	0.01857
BAG3	4281	537	1	108.08	0.2013	1	0.40191
BAG2	4282	1025	6	232.53	0.2269	1	0.06905
RAB3D	4283	3352	2	1050.52	0.3134	2	0.03983
CHD1L	4284	257	1	38.8	0.151	1	0.08738
H6PD	4285	6468	5	1656.5	0.2561	1	0.02944
GTPBP1	4286	2883	3	781.6	0.2711	.	0.13454
GOSR2	4287	3260	6	822.6	0.2523	1	0.05465
NFE2L3	4289	1354	3	421.69	0.3114	2	0.01488
RNF14	4290	2501	11	665.65	0.2662	.	0.27027
TRAF4	4295	1381	2	277.28	0.2008	1	0.28228
NUP155	4298	267	2	68.58	0.2569	1	0.18243
ABCB7	4299	198	4	30.71	0.1551	1	0.06105
ACP1	4300	979	2	289.34	0.2955	2	0.01973
ACTL6A	4301	395	0	85.9	0.2175	1	0.88203
ACVR1B	4302	2969	6	767.92	0.2586	1	0.43582
BIN1	4305	503	0	134.25	0.2669	.	0.34411
APBB2	4307	6065	19	1657.7	0.2733	.	0.2259
ARHGAP1	4308	1962	0	543.32	0.2769	.	0.10849
ARHGDIA	4309	1157	1	259.52	0.2243	1	0.19932
ARL3	4311	3167	6	700.06	0.221	1	0.47828
ARRB2	4313	461	0	125.48	0.2722	.	0.30171
ASAH1	4315	1235	2	306.2	0.2479	1	0.10094
ASNA1	4317	220	0	69.93	0.3179	2	0.5271
ASPH	4318	2803	10	735.18	0.2623	1	0.2114
KIF1A	4321	3600	3	908.82	0.2525	1	0.08461
BAD	4322	381	0	100.36	0.2634	1	0.20575
BAG1	4323	2748	3	591.18	0.2151	1	.
BAX	4324	165	0	31.95	0.1936	1	0.5395
BCL9	4326	1260	3	296.81	0.2356	1	0.74444
BCR	4327	2515	4	793.89	0.3157	2	0.08442
BCS1L	4328	57	0	2.91	0.0511	1	0.24362
BMPR1A	4329	1469	6	391.17	0.2663	.	.
BNIP2	4330	4923	20	1371.78	0.2786	.	0.17462
BNIP3L	4331	2716	6	764.52	0.2815	2	0.46039
BPHL	4332	623	1	148.62	0.2386	1	0.05653
BRAF	4333	585	2	163.94	0.2802	2	0.06726
BUB1	4336	266	1	70.92	0.2666	.	0.06887
OSGIN2	4337	2336	14	658.74	0.282	2	0.15674
PTTG1IP	4339	1996	3	541.06	0.2711	.	0.02215
CAD	4341	274	0	52.08	0.1901	1	0.29899
CALD1	4342	2384	8	504.61	0.2117	1	0.49921
CALR	4343	577	0	148.9	0.2581	1	0.43436
CETN2	4344	514	1	129.82	0.2526	1	0.05294
CASP3	4346	1576	2	480.46	0.3049	2	0.06127
CCNG2	4354	4136	9	1170.48	0.283	2	0.19832
CD81	4356	553	1	160.84	0.2908	2	0.30845
CD151	4357	643	0	134.91	0.2098	1	.
CDC25B	4358	1160	1	312.73	0.2696	.	0.15702
CDC34	4359	535	0	107.08	0.2001	1	0.13996
CLGN	4362	771	3	207.99	0.2698	.	0.20941
CEBPA	4364	1404	1	.	.	.	0.36289
CETN3	4365	729	4	164.28	0.2253	1	0.33404
CNN2	4368	1168	0	405.92	0.3475	2	0.06285
COPA	4371	1570	3	322.13	0.2052	1	0.062
[truncated: 6,971 more rows]
