# Supplementary material for: In vivo reconstitution finds multivalent RNA–RNA interactions as drivers of mesh-like condensates
Source: eLife journal article supplement (doi:10.7554/elife.64252), 2021-03-02

**A**

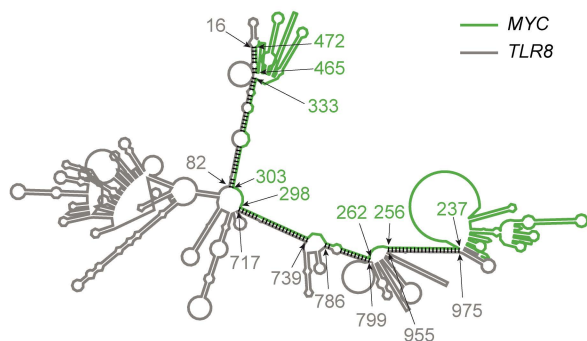

**B**

RNA dimerization motif D1 - tracrRNA/crRNA

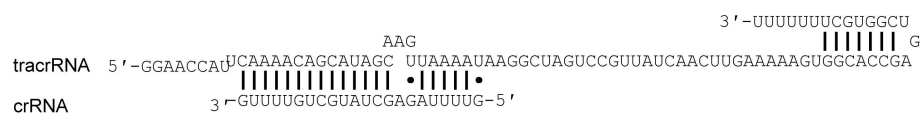

**C**

RNA dimerization motif D2 - HIV dimerization motif

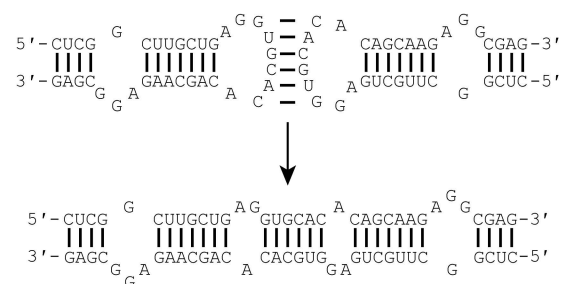

**D**

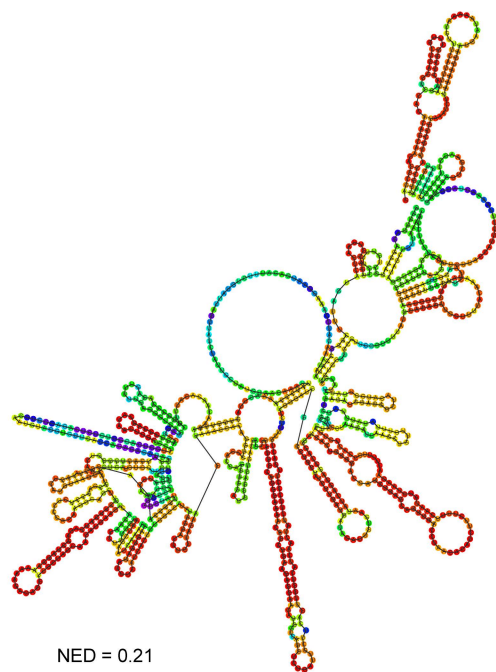

**E**

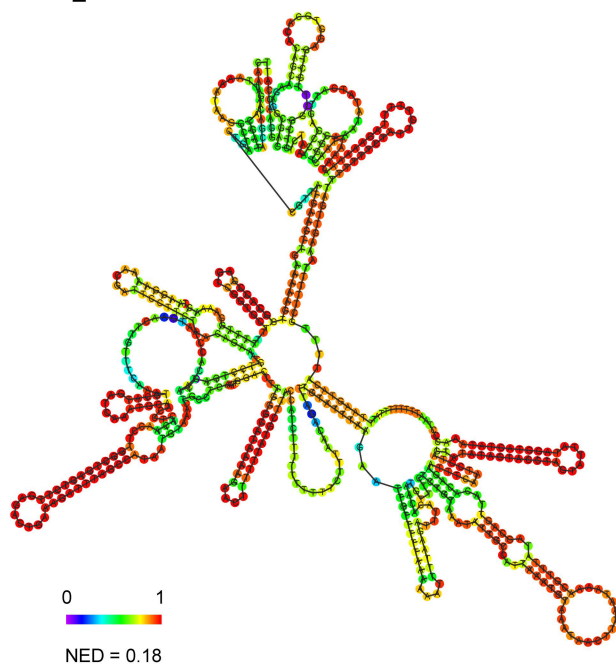

Supplement: supp [file elife-64252-supp-v1.zip]
