# Supplementary material for: In vivo reconstitution finds multivalent RNA–RNA interactions as drivers of mesh-like condensates
Source: eLife journal article supplement (doi:10.7554/elife.64252), 2021-03-02

**A**

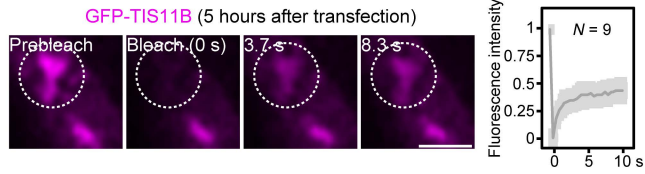

**B**

|                             |        |                                                                                               |
|-----------------------------|--------|-----------------------------------------------------------------------------------------------|
|                             | RBD WT | RYKTELCRPFEENGACKYGDKCQFAHGIHELRLTRHPKYKTELCRTFHTIGFCPYGPRCHFIHNAEE                           |
| RBD mutant CC (C135H/C173H) |        | RYKTELCRPFEENGACKYGDKH <sup>Q</sup> FAHGIHELRLTRHPKYKTELCRTFHTIGFCPYGPR <sup>H</sup> FIHNAEE  |
| RBD mutant FF (F137N/F175N) |        | RYKTELCRPFEENGACKYGDKCQ <sup>N</sup> AHGIHELRLTRHPKYKTELCRTFHTIGFCPYGPRCH <sup>N</sup> IHNAEE |
| RBD mutant KK (K116L/K154L) |        | RY <sup>L</sup> TELCRPFEENGACKYGDKCQFAHGIHELRLTRHPKY <sup>L</sup> TELCRTFHTIGFCPYGPRCHFIHNAEE |
| RBD mutant RK (R114L/K152L) |        | <sup>L</sup> YKTELCRPFEENGACKYGDKCQFAHGIHELRLTRHP <sup>L</sup> YKTELCRTFHTIGFCPYGPRCHFIHNAEE  |

**D**

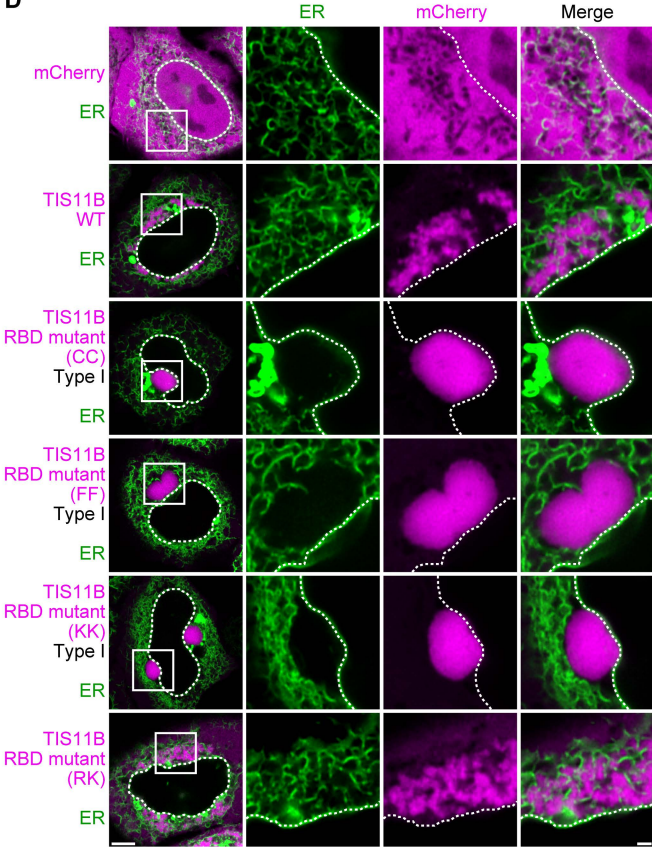

**C**

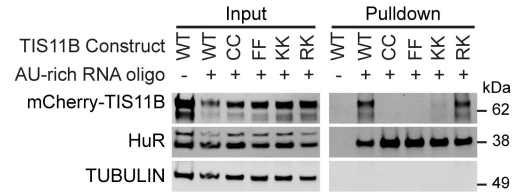

**E**

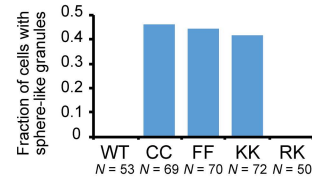

Supplement: supp [file elife-64252-supp-v1.zip]
