# Supplementary material for: In vivo reconstitution finds multivalent RNA–RNA interactions as drivers of mesh-like condensates
Source: eLife journal article supplement (doi:10.7554/elife.64252), 2021-03-02

**A**

*FUS* 3'UTR

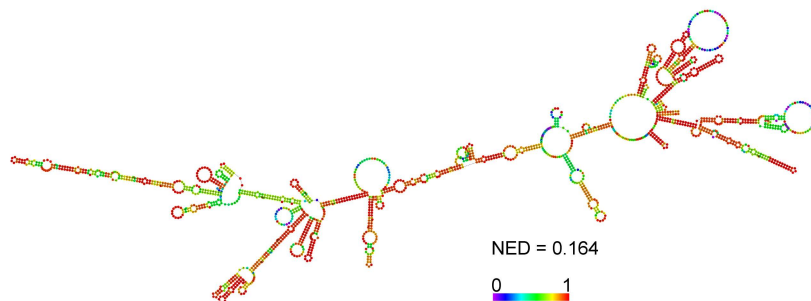

**B**

*MYC* 3'UTR

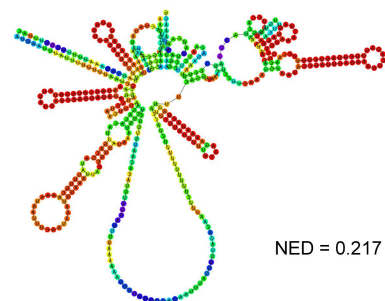

**C**

*DRD1* 3'UTR

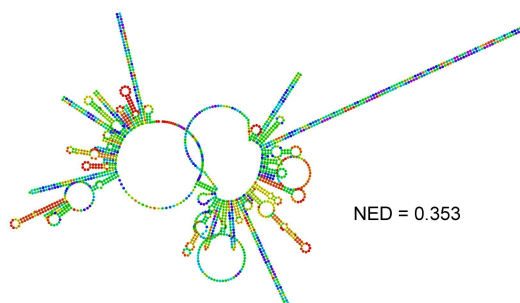

**D**

*FAM174A* 3'UTR

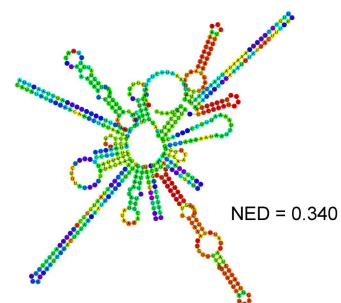

**E**

transfer RNA (tRNA-Ala-AGC-15-1)

GGGGAUUAGCUC AAGUGGUAGAGCGCUCGCUUAGCAUGCGAGAGGUAGUGGGAUCGAUGC-  
CCGCAUUCUCCA

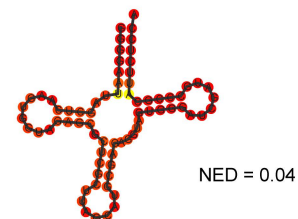

**F**

6 x MS2

GAUCCUAAGGUACCUAAUUGCCUAGAAAACAUAGAGGAUCACCCAUGUCUGCAGGUCGACUC-  
UAGAAAACAUAGAGGAUCACCCAUGUCUGCAGUAUUCGGGUUCAUUAAGAUCCUAAGGUACC  
UAAUUGCCUAGAAAACAUAGAGGAUCACCCAUGUCUGCAGGUCGACUCUAGAAAACAUAGAGGA  
UCACCAUGUCUGCAGUAUUCGGGUUCAUUAAGAUCCUAAGGUACCUAAUUGCCUAGAAA  
CAUGAGGAUCACCCAUGUCUGCAGGUCGACUCCAGAAAACAUAGAGGAUCACCCAUGUCUGCA  
GUUUUCGGGUUCAUUAAGAUUCUGCGCGGAUCG

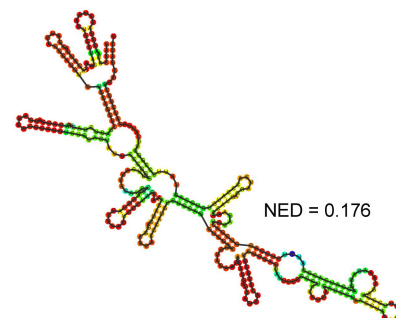

Supplement: supp [file elife-64252-supp-v1.zip]
