# Supplementary material for: In vivo reconstitution finds multivalent RNA–RNA interactions as drivers of mesh-like condensates
Source: eLife journal article supplement (doi:10.7554/elife.64252), 2021-03-02
Supplement: supp [file elife_poa_e64252_Supplementary_file_1.xlsx]

## Sheet: Sheet1
Oligo	Sequence
eGFP A207K	cctgagcacccagtccaagctgagcaaagacccca
TIS11B C135H	gcgggtcaggctgcggagctcgtggatgccgtgtgcgaactggtgcttgtccccgtactt
TIS11B C173H	ccgcaccttccacaccatcggcttttgcccctacgggccccgccaccacttcatccacaa
TIS11B F137N	ggggtggcgggtcaggctgcggagctcgtggatgccgtgtgcgttctggcacttgtcccc
TIS11B F175N	cttccacaccatcggcttttgcccctacgggccccgctgccacaacatccacaacgctga
TIS11B K116L	ggcggcacagctccgtcaggtagcggctggagttg
TIS11B K154L	gcggcacagctccgtcaggtacttggggtggcg
TIS11B R116L	acagctccgtcttgtacagggggtggcgggtcagg
TIS11B K152L	tacaacgcccacaatgtctacatcatgaccgacaa
TIS-HuR 1F	aaacccaagcttatgaccaccaccctcgtgtc
TIS-HuR 1R	aattcgttctgctggagttgacctggcc
TIS-HuR 2F	caactccagcagaacgaatttgatcgtcaa
TIS-HuR 2R	gggcacggcgctggttggggttggctgcaa
TIS-HuR 3F	ccccaaccagcgccgtgccctggccggggc
TIS-HuR 3R	cctggaattcttagtcatctgagatggaaagtctgc
TIS-HuR 2R-2	tcagcggagaggtcccgggccccggccagggcacggcgctggttggggttggctgcaa
TIS-SUMO-SIM 1F	agatccgctagcgctaccggtcgccaccatggtgagcaagggcgagga
TIS-SUMO-SIM 1R	cttgtagagctcgtccatgc
TIS-SUMO-SIM 2F	gcatggacgagctctacaagcgctacaagacggagctgtgccgcc
TIS-SUMO-SIM 2R	atgctgtacagctcttcagcgttgtggatga
FUS-TIS 1F	atgctgtacaagatggcctcaaacgattatac
FUS-TIS 1R	tcttgtagcgtccacggtcctgctgtccat
FUS-TIS 2F	ggaccgtggacgctacaagacggagctgtg
FUS-TIS 2R	cctggaattcttactcttcagcgttgtggatga
MBP F	acaattcccctctagaaataattttgtttaactttaagaaggagatataccatgggcag
MBP R	gagctcgaattcggatccgcgacccatttgctgtccaccagtcatgctagcggattggaagtaca
mGFP F	ccaagctggctagcatggtgagcaagggcgagga
TIS RBD-Strep-tag R	atcctggaattcttacttttcgaactgcgggtggctccatgcgctctcttcagcgttgtggatga
CD47 3′UTR T7 F	taatacgactcactatagggctgaagtgaagtgatggact
CD47 3′UTR R	gactgatttaaaacttttaattaa (old, tm too low)
ELAVL1 3′UTR T7 F	taatacgactcactatagggctcgctcatgcttttttttgtacg
ELAVL1 3′UTR R	cgcaatgatcccacttcatttattac
CD274 3′UTR T7 F	taatacgactcactatagggtccagcattggaacttctga
CD274 3′UTR R	taactttctccactgggatg
FUS 3′UTR T7 F	taatacgactcactatagggttagcctggctccccaggttct
FUS 3′UTR R	tgctggcaggggaagtaaac
CD44 3′UTR T7 F	taatacgactcactatagggcacctacaccattatcttggaaag
CD44 3′UTR R	tctgtttcctttagtcttttaatgttagcc
VSIG10 3′UTR T7 F	taatacgactcactatagggagaagaggatggtccatggtt
VSIG10 3′UTR R	ttacttaaaaatagctttattccattatcttttaaaaaaggc
IL10 3′UTR T7 F	taatacgactcactataggggacatcagggtggcgactctat
IL10 3′UTR R	tgatgtgaataagatacatttatttattcaaaattaaaatctg
TNFSF11 3′UTR T7 F	taatacgactcactataggggccccagtttttggagtgttatgt
TNFSF11 3′UTR R	gcaggttttcatataaatttatttttgtacca
GPR39 3′UTR T7 F	taatacgactcactatagggatgtcaagcgagggagccttga
GPR39 3′UTR R	tgaactctgacttaaaatgtaaataagtctattt
TLR8 3′UTR T7 F	taatacgactcactatagggctgacgttaagtcatgatttcgcg
TLR8 3′UTR R	ttgtaaaatgaaacatttttattcattcattttaagatttacagc
GPR34 3′UTR T7 F	taatacgactcactatagggggtaaacatactaaaatgaattatataatgcagcc
GPR34 3′UTR R	tcattttttaattaggattttattaattatcttttcatctgt
TNFAIP6 3′UTR T7 F	taatacgactcactatagggaaaaaaaaaaaaggatgatcaaaacacacag
TNFAIP6 3′UTR R	tgtgttcaaggatatttattgcaacaatatttatg
MYC 3′UTR T7 F	taatacgactcactatagggggaaaagtaaggaaaacgattccttc
MYC 3′UTR R	agatttggctcaatgatatatttgccag
PLA2G4A 3′UTR T7 F	taatacgactcactatagggttcatgtactggaaatggcagca
PLA2G4A 3′UTR R	ttatttttatattgatgtatttatttcatgtatgtatatatatgcat
HEATR5B 3′UTR T7 F	taatacgactcactatagggtttgtaatttcatttatttgtatttatgttgtcaact
HEATR5B 3′UTR R	tgaacctttaaatgagaattttaattgttacc
PPP1R3F 3′UTR T7 F	taatacgactcactataggggctctgcttgtgggatcagcag
PPP1R3F 3′UTR R	ttttgttgagcagttttttatttgcatgc
DRD1 3′UTR T7 F	taatacgactcactatagggactcgcagatgaatcctgccac
DRD1 3′UTR R	tttgagttcacaaaatatttttattatgtgtaagaaagc
FAM72B 3′UTR T7 F	taatacgactcactatagggatggaattatgatatatatgatatacaaac
FAM72B 3′UTR R	tatactttaagtactatttatttatatttttacatac
MCOLN2 3′UTR T7 F	taatacgactcactatagggagttctgctaaagatgattaaagttcag
MCOLN2 3′UTR R	tggaatgatgaaaataaatttatttagag
TSPAN13 3′UTR T7 F	taatacgactcactatagggtgagaaaacaaggaagatttcctttcg
TSPAN133′UTR R	ttcatcgatcaattcttccattactttctttta
LHFPL6 3′UTR T7 F	taatacgactcactataggggatggagctaccaagagcagac
LHFPL6 3′UTR R	tattgatcaaagagagaatttattcacagag
FAM174A 3′UTR T7 F	taatacgactcactataggggaatgtgccttttgatgaaagaac
FAM174A 3′UTR R	tttaagagaatttaaaatcatatttattgttttgc
VPS29 3′UTR T7 F	taatacgactcactatagggagccaggcctgtcttgatga
VPS29 3′UTR R	tctgaaaggtcatctcgtccac
ADPGK 3′UTR T7 F	taatacgactcactatagggaagattcttaggggtaatttttctga
ADPGK 3′UTR R	tgaagatcagaatgatttttatcttatctgg
ASPN 3′UTR T7 F	taatacgactcactatagggtaattagtaattggtaatgtccatttaatataagattca
ASPN 3′UTR R	ttttatttcaaaccaatatttttaatgaaaatttccc
CASP8 3′UTR T7 F	taatacgactcactatagggtggtgctattttgtttgttttgttt
CASP8 3′UTR R	tttaataagatcaaattatattttattctattaaaaaatgtttttgaa
CLCA2 3′UTR T7 F	taatacgactcactatagggataaatatccaaagtgtcttccttcttag
CLCA2 3′UTR R	ttaaaaaggcaaatgattttattgttcgataa
EOMES 3′UTR T7 F	taatacgactcactatagggagagttattttaacctcaaaaattagctaact
EOMES 3′UTR R	ttcccttactgaaccacatttattaaaaat
ESCO1 3′UTR R	taatacgactcactatagggaacaaattcttgcctacacca
ESCO1 3′UTR T7 F	tcagttagtacattggtcacttaga
GLYATL3 3′UTR R	taatacgactcactatagggcccagtaaaaaactgcagtg
GLYATL3 3′UTR T7 F	taaaattaatattttaattatgtaagcattttaattttcattataaaaaagg
HNRNPH3 3′UTR R	taatacgactcactatagggaagcaaaaacaccaacatacaag
HNRPNH3 3′UTR T7 F	tactattatctcccacaatgacatttattaataac
HOGA1 3′UTR R	taatacgactcactatagggcaggcagggtccatggc
HOGA1 3′UTR T7 F	ttttttctgttaaattttattatagtaacaaagtgac
LPAR4 3′UTR R	taatacgactcactataggggtatgagaaatgtgttcaggtcc
LPAR4 3′UTR T7 F	tttggtttagtttatgtgttgttttttttttttattt
LRBA 3′UTR R	taatacgactcactatagggtggtgacagctgtacatcaa
LRBA 3′UTR T7 F	ttcacaacatacaaagaatttatttatgcaatac
LYPLAL1 3′UTR R	taatacgactcactatagggatgaatcaagagtgatttgttaatgtaagt
LYPLAL1 3′UTR T7 F	tgaatattcatagcagctttatttaaaacagc
ODF2 3′UTR T7 F	taatacgactcactatagggccacttatcagggcctgg
ODF2 3′UTR R	tggtgaacaaaaatggccca
PRKDC 3′UTR T7 F	taatacgactcactatagggggtctgtgggagtctgca
PRKDC 3′UTR R	ttttggaaaaaaactttattaaacactcaaga
RHOA 3′UTR T7 F	taatacgactcactatagggaaccttgctgcaagcacag
RHOA 3′UTR R	tttagaaaactgcctttattctattagtagttg
SHQ1 3′UTR T7 F	taatacgactcactatagggctcttaggtggttttattcattgttg
SHQ1 3′UTR R	ttgtacacaaatgttcataacagc
SLC39A6 3′UTR T7 F	taatacgactcactatagggttaaggtttaaatgctagagtagcttaaaa
SLC39A6 3′UTR R	tcaagctgatataaggaatttattgtgtaa
SLC5A9 3′UTR T7 F	taatacgactcactatagggttccacagacctggcttcag
SLC5A9 3′UTR R	ttaactcaatacacatttattgaacagctg
SMIM3 3′UTR T7 F	taatacgactcactatagggagcctcccaagagggccgg
SMIM3 3′UTR R	tgcacattctagcactttattggaa
SNTN 3′UTR T7 F	taatacgactcactatagggacagttttaaatatgctgtataaaataatggc
SNTN 3′UTR R	tttttttgttaagtcagatttatttaggtataattgac
SOSTDC1 3′UTR T7 F	taatacgactcactatagggaactcagactcccataactaga
SOSTDC1 3′UTR R	ttacccttatacatttattctacaatttttgc
STBD1 3′UTR T7 F	taatacgactcactatagggttcagtttgcaaagtaatggagaa
STBD1 3′UTR R	tgaagatattaaaattcaggttttattatttgttcag
TP53TG3 3′UTR T7 F	taatacgactcactatagggtactgcacgactactcg
TP53TG3 3′UTR R	aaacagaatccagtctttttaatcc
TTC17 3′UTR T7 F	taatacgactcactatagggtgcacttcttccttctctct
TTC17 3′UTR R	ttttgctcataaacaattttattttttttctcagtat
TNFSF11 mutant R1	acaaagtgcaccagttaaatatgtc
TNFSF11 mutant F2	gacatatttaactggtgcactttgtcagtttctcataaggaaattccctggggaaaactt
TNFSF11 mutant R2	tatatgaaaacctgcgcaggttttcatataaatttatttttgtacca
D1a-TLR8-D2 1F	gggttttagagctatgctgttttgctgacgttaagtcatgatttcgcg
D1a-TLR8-D2 1R	gtgcacctcagcaagccgagttgtaaaatgaaacatttttattcattcattttaagatttacagc
D1a-TLR8-D2 2F	taatacgactcactatagggttttagagctatgctgttttg
D1b-MYC-D2 1F	caccgagtcggtgctttttttggaaaagtaaggaaaacgattccttc
D1b-MYC-D2 2F	gttaaaataaggctagtccgttatcaacttgaaaaagtggcaccgagtcggtgcttttttt
D1b-MYC-D2 2R	gtgcacctcagcaagccgagagatttggctcaatgatatatttgccag
D1b-MYC-D2 3F	taatacgactcactataggaaccattcaaaacagcatagcaagttaaaataaggctagtccgttatc
D2 R	ctcgcctcttgctgtgtgcacctcagcaagccgag
FUS-HuR 1F	aaacccaagcttatggcctcaaacgattatac
FUS-HuR 1R	aattcgttcttccacggtcctgctgtccat
FUS-HuR 2F	ggaccgtggaagaacgaatttgatcgtcaa
FUS-HuR 2R	atcctggaattcttactggttggggttggctgcaa
HuR RBD F	aaacccaagcttagaacgaatttgatcgtcaa
TLR8-MS2 F	acgagctgtacaagtaactgacgttaagtcatgatttcgcg
TLR8-MS2 R	atcctggaattcttgtaaaatgaaacatttttattcattcattttaagatttacagc
MYC-MS2 F	acgagctgtacaagtaaggaaaagtaaggaaaacgattcc
MYC-MS2 R	atccctggaattcagatttggctcaatgatatatttgccag
D1D2-MS2 F1	acgagctgtacaagtaagttttagagctatgctgttttgctg
D1D2-MS2 R	atcctggaattcctcgcctcttgctgtgtg
D1D2-MS2 F2	acgagctgtacaagtaaggaaccattcaaaacagcatagc
MS2-SUMO-SIM F	cgctagcgctaccggtcgccaccatggcttctaactttactca
MS2-SUMO-SIM R	ggtaccaagcttcttgtacagctcgtccat
