# Supplementary figures and images for: In vivo reconstitution finds multivalent RNA–RNA interactions as drivers of mesh-like condensates
Source: eLife journal article supplement (doi:10.7554/elife.64252), 2021-03-02

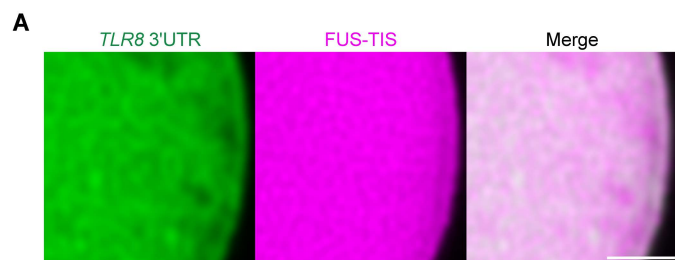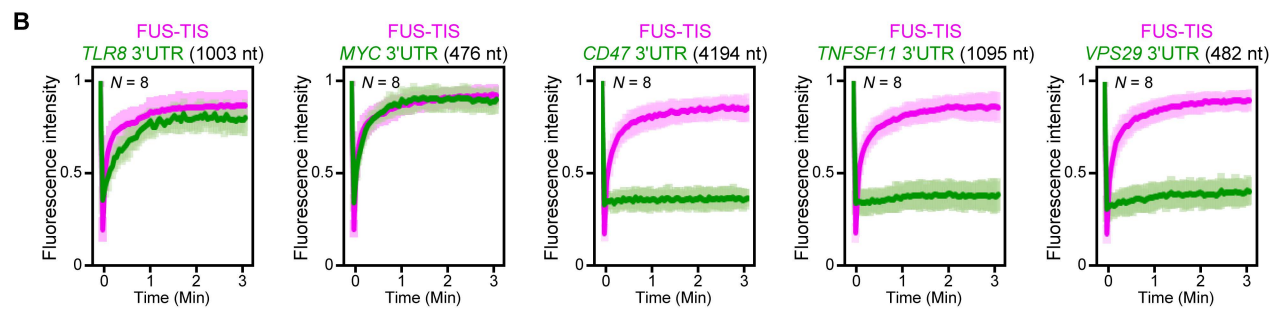

Supplement: supp [file elife-64252-supp-v1.zip]

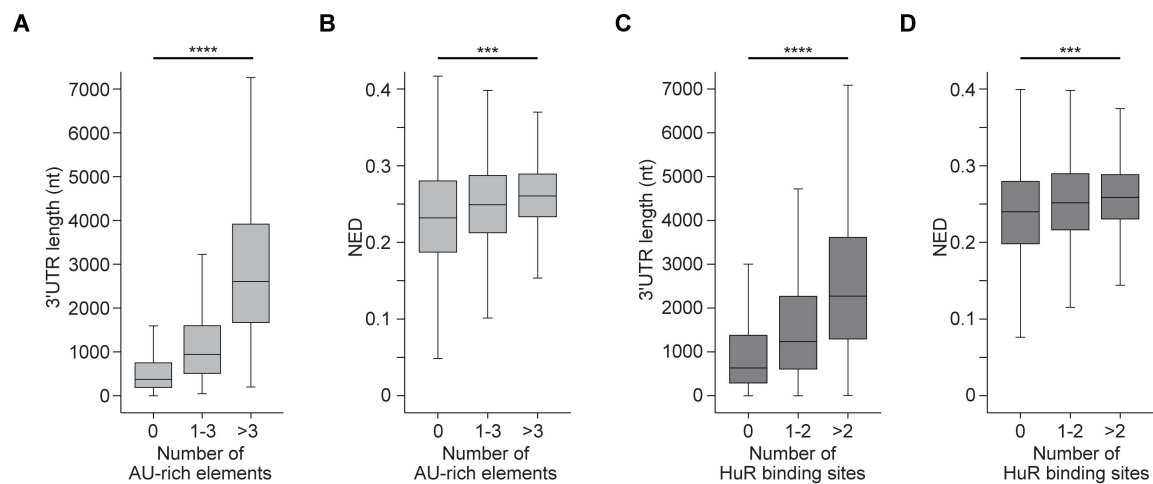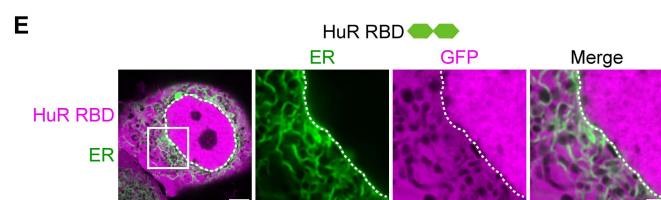

Supplement: supp [file elife-64252-supp-v1.zip]

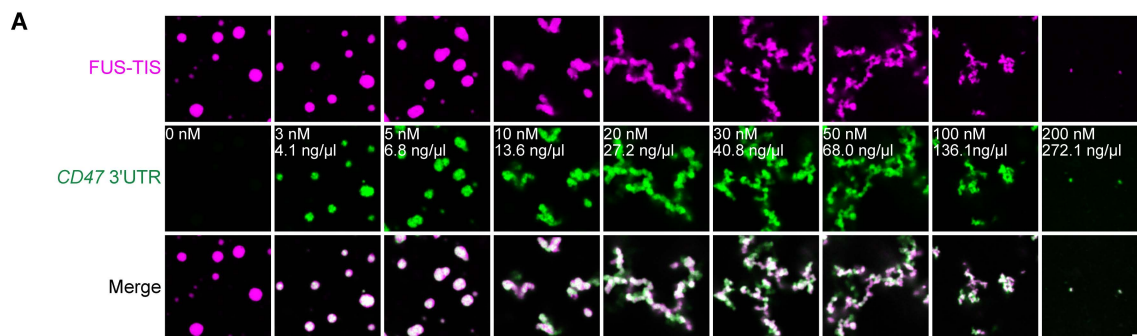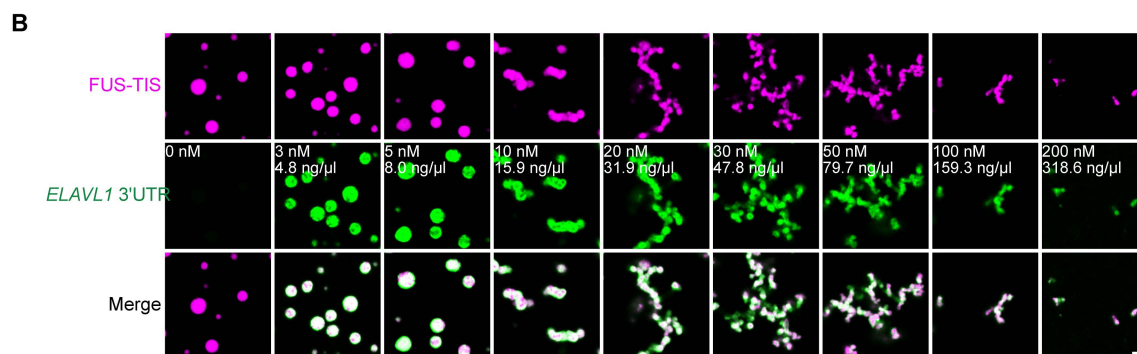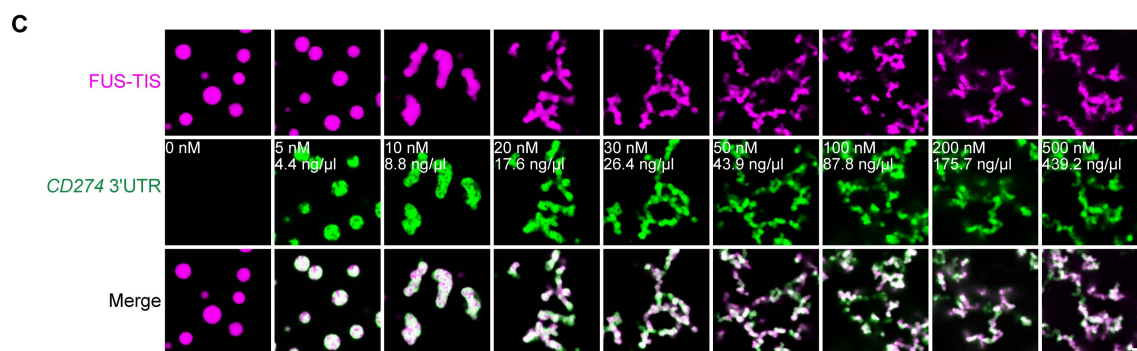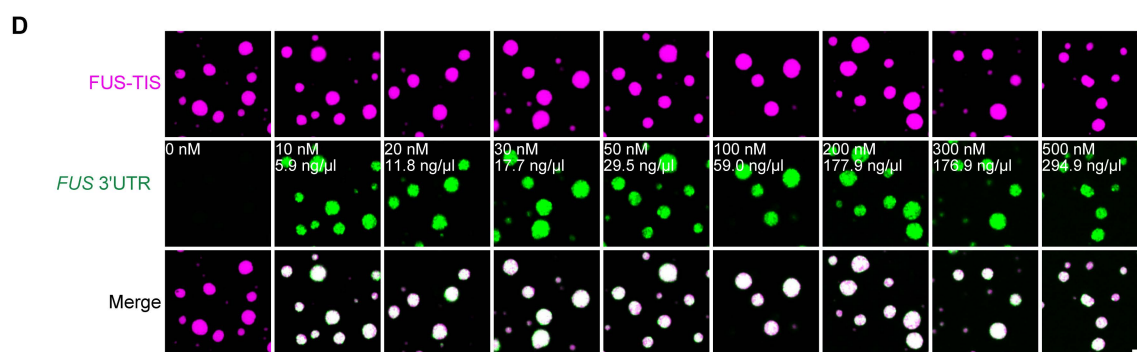

Supplement: supp [file elife-64252-supp-v1.zip]

**A**

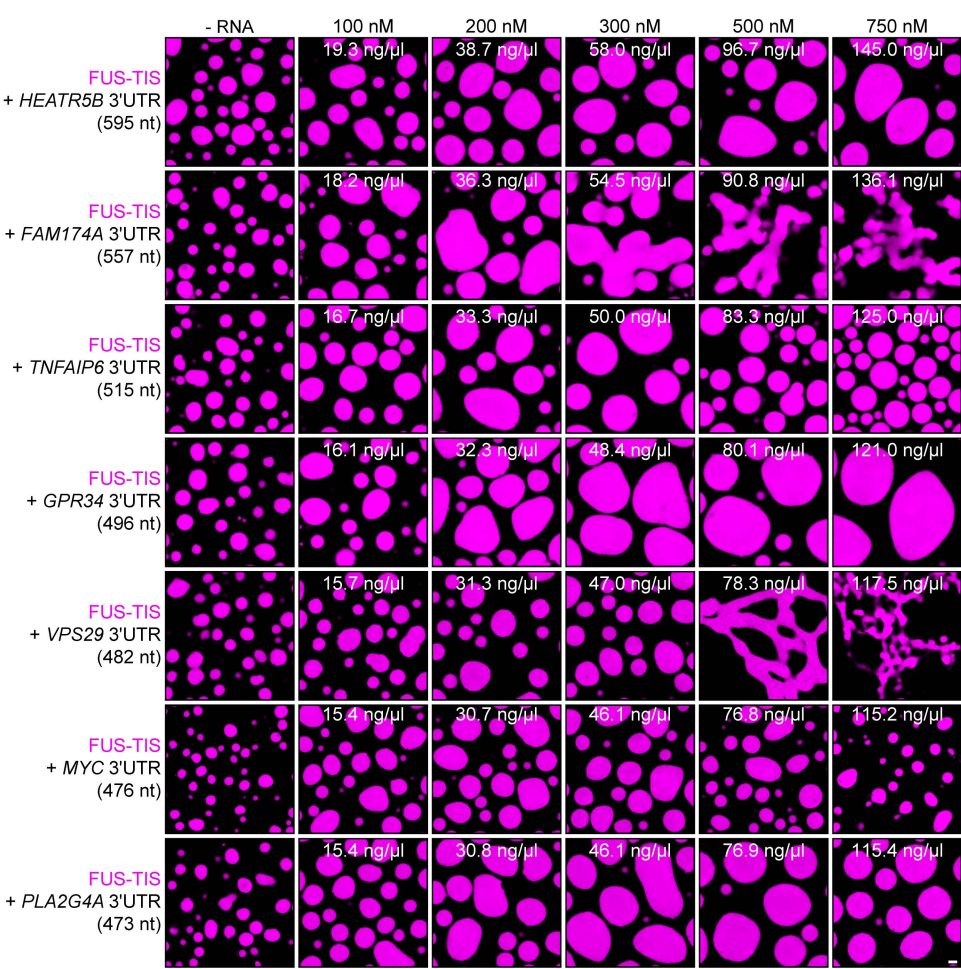

**B**

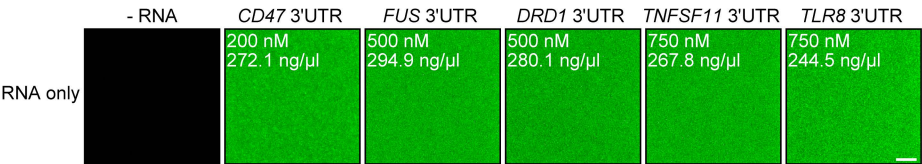

Supplement: supp [file elife-64252-supp-v1.zip]

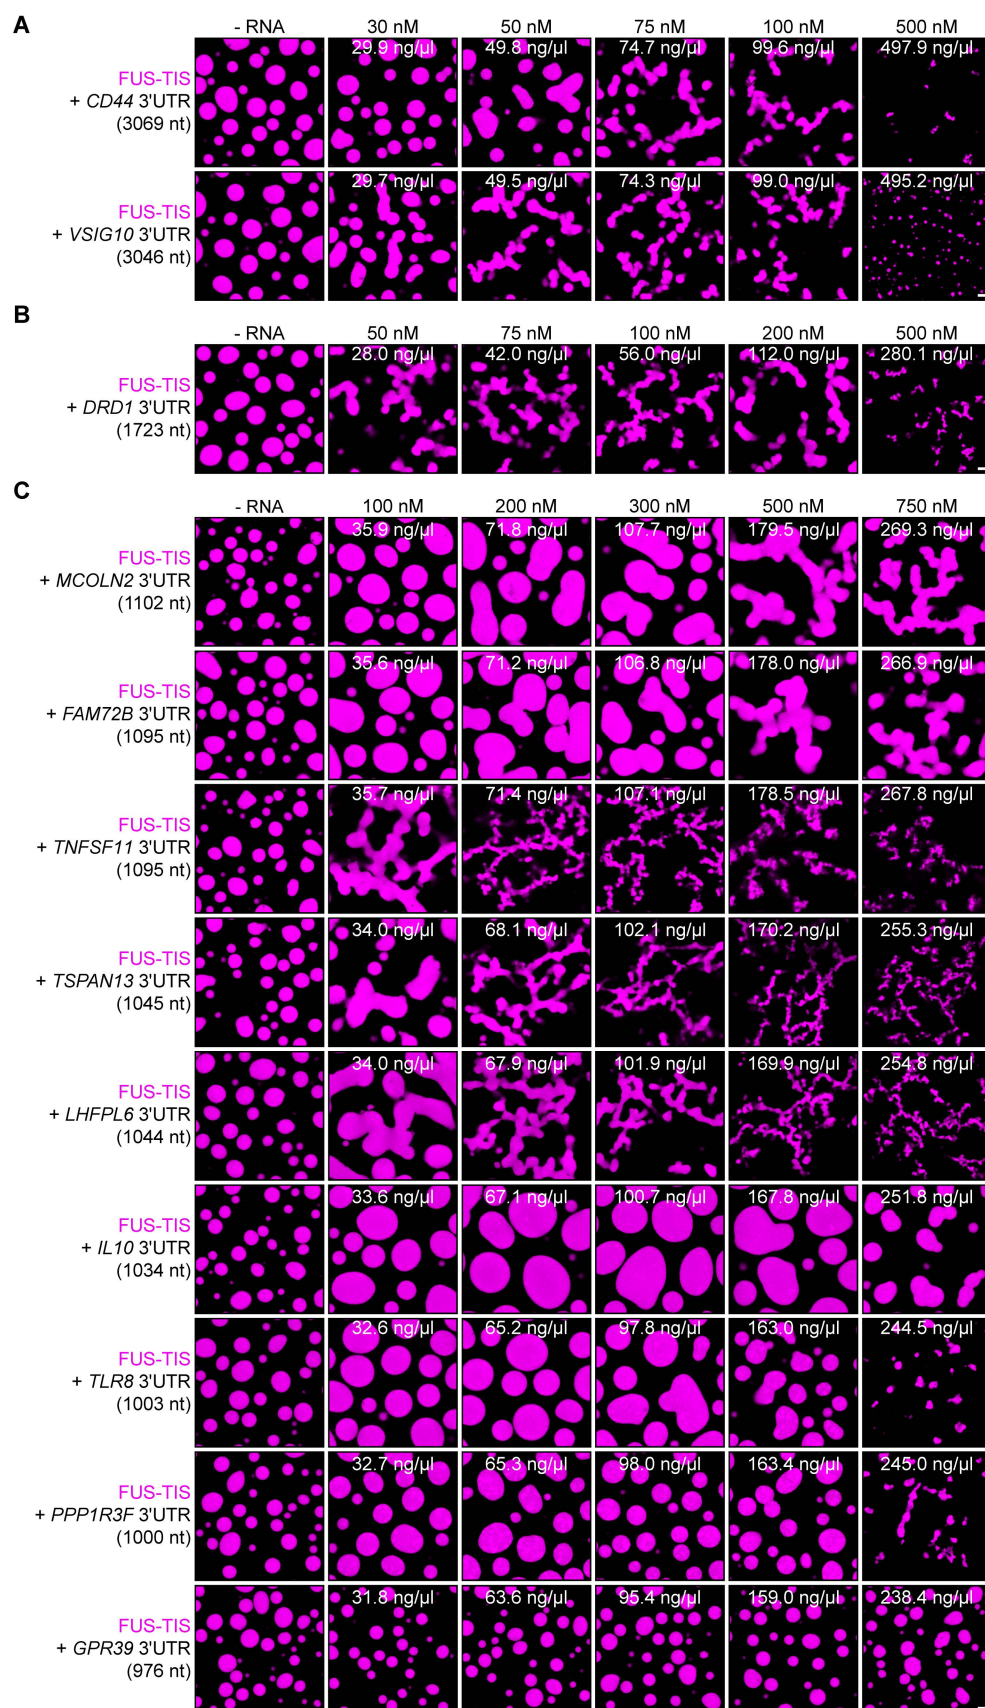

Supplement: supp [file elife-64252-supp-v1.zip]

**A**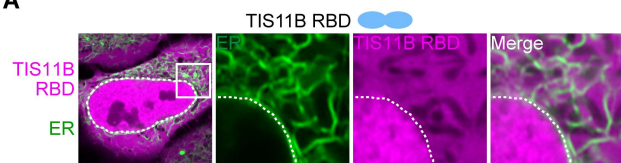**B**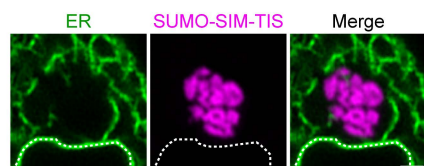**C**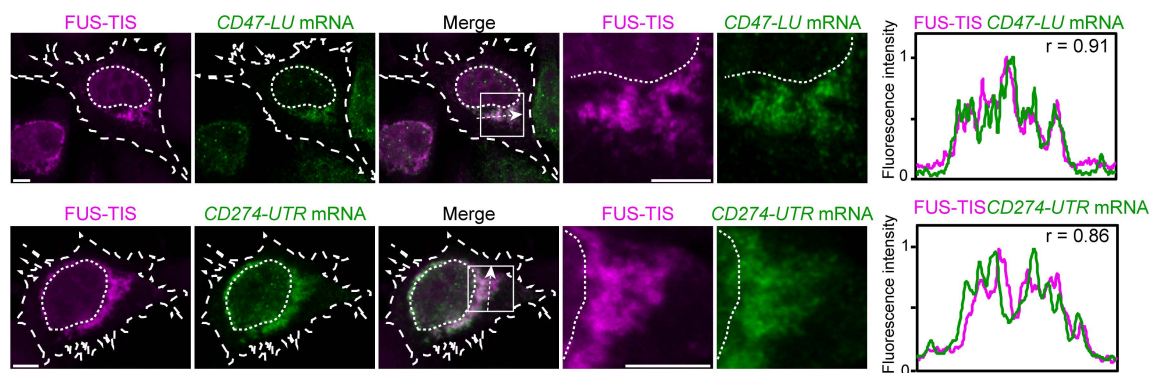

Supplement: supp [file elife-64252-supp-v1.zip]

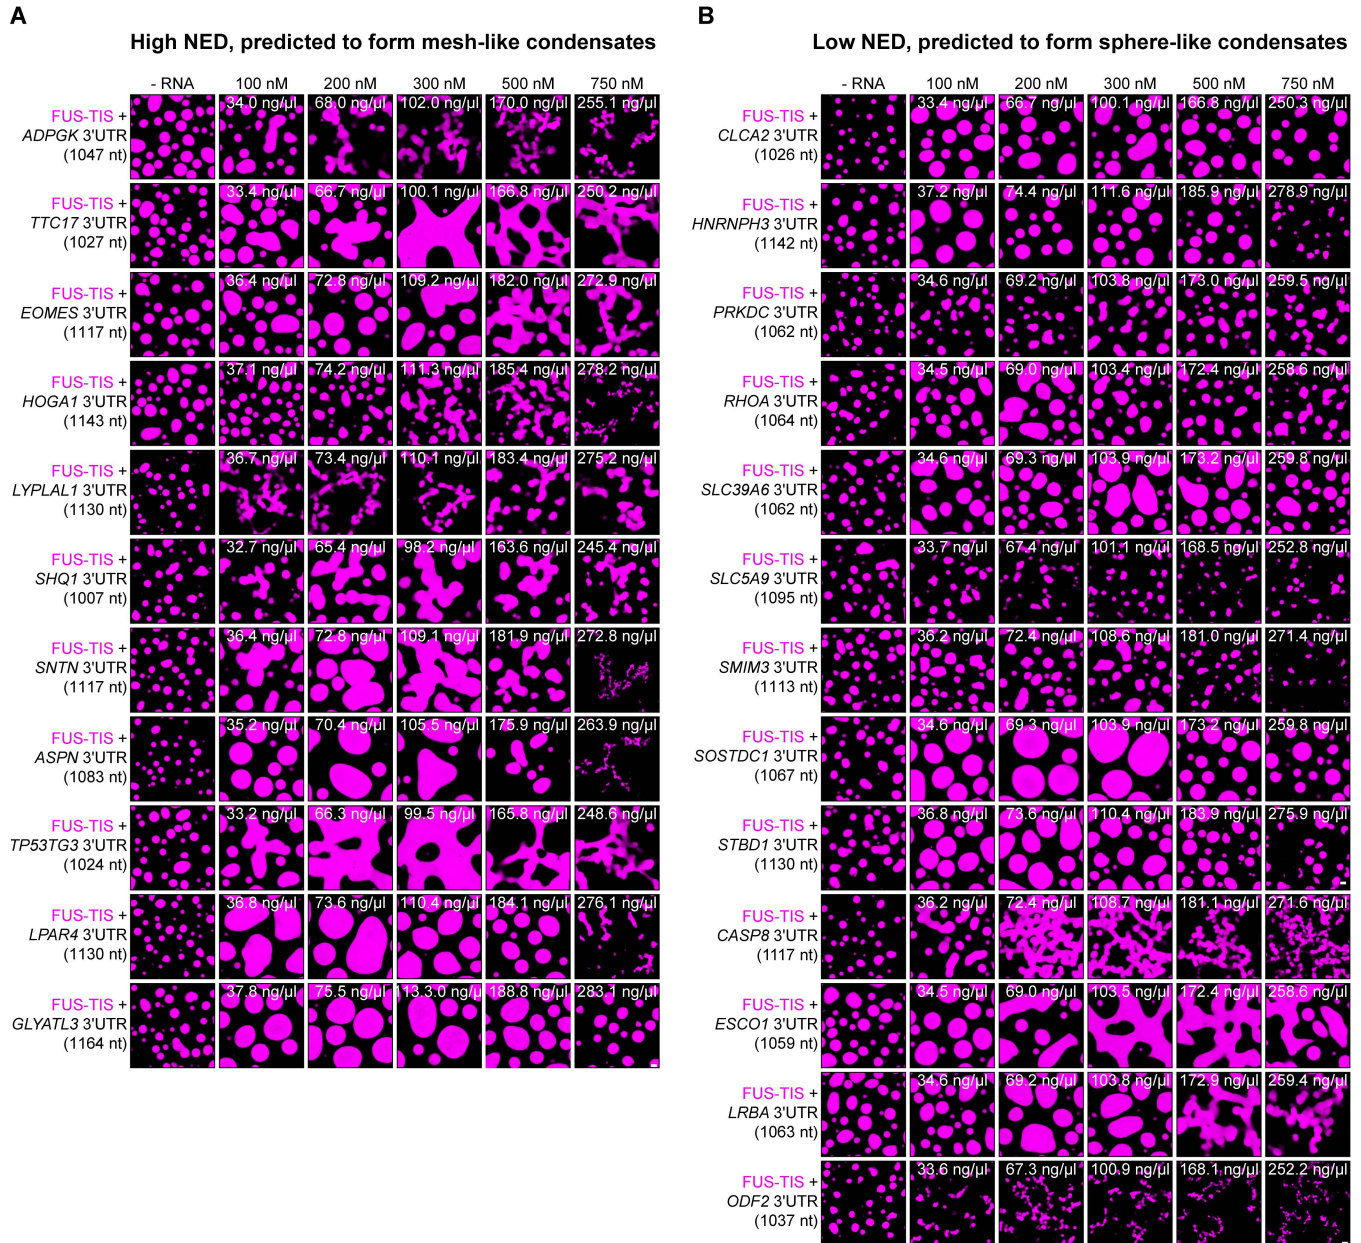

Supplement: supp [file elife-64252-supp-v1.zip]

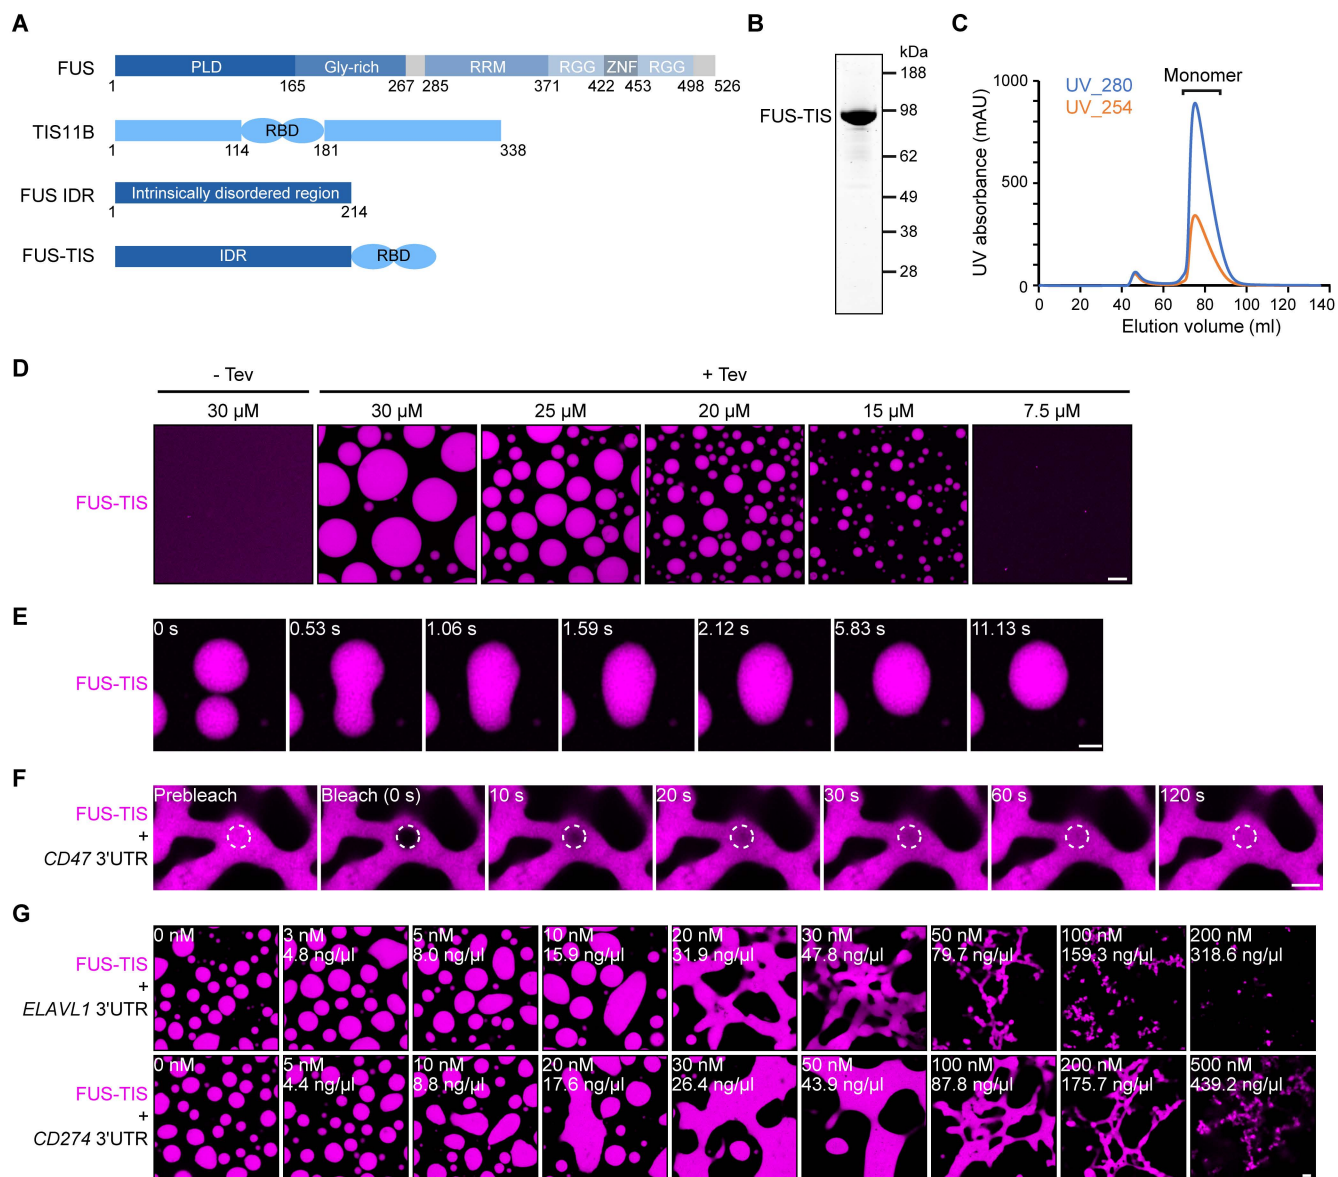

Supplement: supp [file elife-64252-supp-v1.zip]
